# Supplementary material for: LNA-enhanced DNA FIT-probes for multicolour RNA imaging
Source: PubMed Central journal article supplement — Chem Sci. 2015 Nov 2;7(1):128–35. doi: 10.1039/c5sc03053f (PMC5950760; doi:10.1039/c5sc03053f), 2015-11-02

## LNA-Enhanced DNA FIT-Probes for Multicolour RNA Imaging

### Supporting Information

F. Hövelmann<sup>a,b</sup>, I. Gaspar<sup>b</sup>, . Chamiolo<sup>a</sup>, M. Kasper<sup>a</sup>, JJ. Steffen<sup>a</sup>, A. Ephrussi<sup>b</sup> and O. Seitz<sup>a,\*</sup>

a Department of Chemistry, Humboldt University Berlin, Brook-Taylor-Str. 2, D-12489 Berlin, Germany  
Fax: +49 30 2093 7266, E-mail: oliver.seitz@chemie.hu-berlin.de

b European Molecular Biology Laboratory (EMBL) Heidelberg, Meyerhof Str. 1, 69117 Heidelberg, Germany

|                                                                   |            |
|-------------------------------------------------------------------|------------|
| <b>1.) General aspects</b>                                        | <b>S1</b>  |
| <b>2.) Synthesis</b>                                              | <b>S2</b>  |
| <b>3.) DNA-synthesis and labelling</b>                            | <b>S7</b>  |
| <b>4.) Analytical data of <i>H1N1-neuraminidase</i> probes</b>    | <b>S8</b>  |
| <b>5.) Analytical and fluorescence data of <i>vasa</i>-probes</b> | <b>S22</b> |
| <b>6.) Multi-colour RNA Detection</b>                             | <b>S24</b> |
| <b>7.) Fluorescence <i>in-situ</i> hybridization</b>              | <b>S25</b> |
| <b>8.) NMR-spectra</b>                                            | <b>S28</b> |

## 1.) General aspects

**General information:** Reagents were purchased from Sigma-Aldrich (St. Louis, USA), Acros Organics (Geel, Belgium or Link Technologies (Bellshill, Scotland). Synthetic oligoribonucleotides were obtained from Noxon-Pharma AG (Berlin, Germany).  $\text{CH}_2\text{Cl}_2$  was dried by using the solvent purification system *SPS 800* of *MBraun*. Aqueous solutions were made of water purified using a *Milli-Pore* purification device. TLC plates *Silica Gel 60 F254* were obtained from Merck (Darmstadt, Germany).

**DNA-Synthesis, work-up and purification for Ser(BO), Ser(TO) and LNA-enhanced TO- and QB-FIT probes:** The DNA FIT probes were assembled by using a *Bioautomation MerMade-4.* CPG support was purchased from *Link Technologies* (1  $\mu\text{mol}$ , pore size 500 Å) and DNA synthesis reagents were purchased from *Roth* (Karlsruhe, Germany) and *EMP-Biotech* (Berlin, Germany). DNA phosphoramidites (dT, dG(DMF), dC(Bz) and dA(Bz)) were obtained from Thermo Fisher Scientific (Waltham, USA), 2'-O-Me-building blocks were purchased from Link Technologies and LNA phosphoramidites were obtained from Exiqon (Vedbak, Denmark). All phosphoramidites were used according to manufactures instructions. The quality of each coupling step was monitored by measuring the absorbance of DMTr cleavage solutions. The synthesizer was programmed to yield oligomers carrying the terminal DMTr protective group „trityl-on“. Synthesis of LNA/2'-O-Me-Oligos was carried out on 3'-C3-modified CPG (*Link Technologies*). After synthesis the resulting CPGs were dried under reduced pressure and then transferred to 2 mL tubes. 1 mL of aqueous ammonia (32%) was added and the tubes were agitated for 2 h at 55 °C. After centrifugation the supernatant was collected. The volatiles were removed at reduced pressure and the residues were dissolved in water. The crude product was purified by preparative RP-HPLC (DMTr-on, 15-40% B in 10 min, A = 0.1 M triethylammonium acetate, aq. pH 7.5; B = MeCN). Afterwards, the DMTr group was removed upon treatment with 300  $\mu\text{L}$  of 80% aqueous AcOH for 30 min at room temperature. The detritylation mixture was treated with *iPrOH* and the resulting precipitate, if necessary, again purified by RP-HPLC (DMTr-off, 5-20% B in 10 min, A = 0.1 M triethylammonium acetate, aq. pH 7.5; B = MeCN). Finally, the oligonucleotides were desalted by precipitation with ammonium acetate and *iPrOH*. The pellets were dissolved in water (Milli-Pore) and the purity was determined by using analytical RP-HPLC-UV (260 nm) and MALDI-TOF mass spectrometry.

**preparative HPLC** was carried out on an *1105 HPLC System* from *Gilson*, using a *Waters X-Bridge BEH130 C18 (10x150mm, 5  $\mu\text{m}$ )* at a flow rate of 8 mL/min at 55 °C.

**Analytical HPLC** was carried out on an *1105 HPLC System* from *Gilson* by using a *Waters X-Bridge BEH130 C18 (4.6x250mm, 5  $\mu\text{m}$ )* column or on an *Acquity-UPLC®-System* from *Waters* using a binary mixture of A (0.1 M triethylammonium acetate, aq. pH 7.5) and B (MeCN).

For analysis via UPLC®-RP-UV a *BEH 130 C18-column 1.7 mm (2.1x50mm, 130 Å)* from *Waters* was used at 50 °C. **Gradient I:** 3% B to 30% B in 4 min, 0.6 mL/min.

For analysis via *Gilson HPLC-RP-UV* a *X-Bridge BEH130 C18-column (4.6x250mm, 5  $\mu\text{m}$ )* from *Waters* was used at 55 °C. **Gradient II:** 3% B to 30% B in 20 min, 1.0 mL/min; **gradient III:** 5% B to 35% B in 12 min, 1.5 mL/min.

**MALDI-TOF mass spectra** were measured on a *Shimadzu Axima Confidence* in positive or negative mode. For measurements in positive mode HPA Matrix was used (1:1 mixture of 50 mg/mL 3-hydroxy picolinic acid in MeCN/H<sub>2</sub>O, 1:1 and 50 mg/mL diammonium citrate in MeCN/H<sub>2</sub>O, 1:1). For measurements in negative mode THAP-Matrix was used (1:1 mixture of 50 mg/mL 2,4,6-trihydroxy acetophenone in MeCN/H<sub>2</sub>O, 1:1 and 50 mg/mL diammonium citrate in MeCN/H<sub>2</sub>O, 1:1).

**Fluorescence spectroscopy:** Fluorescence emission spectra were measured by using a *Varian Cary Eclipse* fluorescence spectrometer and 10 mm quartz cuvettes in phosphate buffer (10 mM Na<sub>2</sub>HPO<sub>4</sub>, 100 mM NaCl, pH 7) and are corrected for buffer fluorescence. FIT-probes and target RNA were added as specified. Prior to measurement, samples were allowed to equilibrate for 2 min. Settings:  $\lambda_{\text{ex}}$  = 485 nm,  $\lambda_{\text{em}}$  = 500-700 nm, slit<sub>ex</sub> = 5 nm, slit<sub>em</sub> = 5 nm. The spectra are the average of 3 measurement cycles. Quantum yields were assessed by using ATTO 520 for TO and ATTO 590 for QB (purchased from ATTO-Tec GmbH, Siegen, Germany) as a standard, using excitation at 485 nm and 560 nm, respectively. All fluorescence measurements were corrected according to their concentration in the cuvette (determined by UV-Vis absorption measurements). The fluorescence measurements were reproducible within 5-10% error.

**UV-Vis spectroscopy:** Melting temperatures and probe concentrations were measured on a *Varian Cary Bio 100 UV-Vis* spectrometer. For melting analysis the absorbance at 260 nm was monitored during a thermal cycle (3 times 25-85 °C in 0.5 °C/min). To determine melting temperatures  $T_M$ , the inflexion points of the resulting melt curves were calculated by the Varian Cary software. Melting temperatures were average values of three cycles. Complete absorption spectra (620-220 nm, 1 nm steps) were measured directly before or after the fluorescence experiments in the same cuvettes.

## 2.) Synthesis

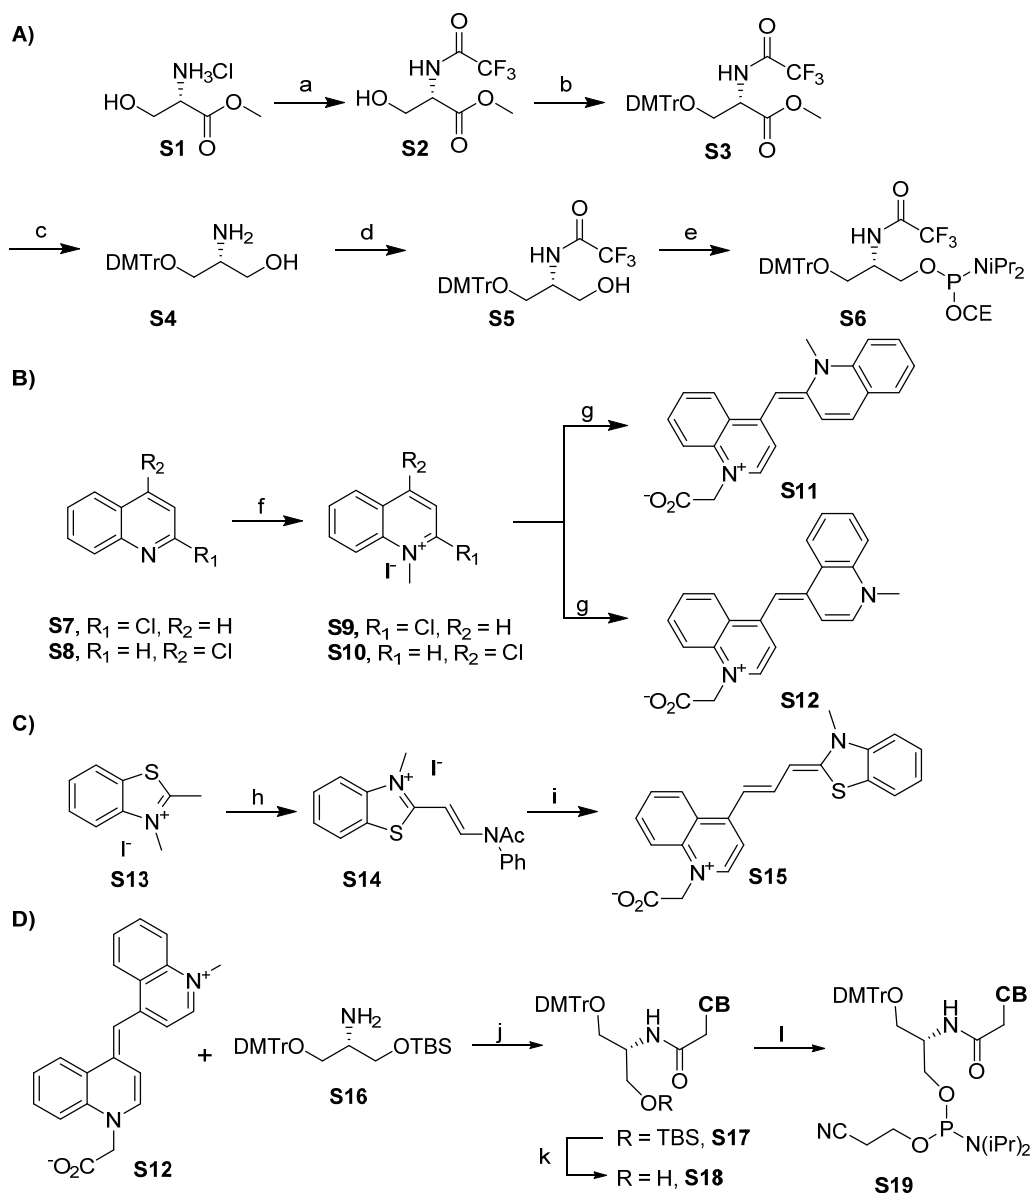

**Scheme S1:** Synthesis of chemical building blocks. A) Ser(Tfa)-phosphoramidite: a) ethyl trifluoroacetate,  $\text{NEt}_3$ ,  $\text{CH}_2\text{Cl}_2$ , 87%; b) DMTrCl, pyridine, 98%; c)  $\text{LiBH}_4$ , MeOH, THF, 72%; d) ethyl trifluoroacetate,  $\text{NEt}_3$ ,  $\text{CH}_2\text{Cl}_2$ , 76%; e) 2-cyanoethyl-*N,N*-diisopropylchloro phosphoramidite,  $\text{EtNiPr}_2$ ,  $\text{CH}_2\text{Cl}_2$ , 73%; B) QV and QB: f) MeI, reflux, 60-83%; g) carboxymethylated 4-methylquinoline,  $\text{NEt}_3$ ,  $\text{CH}_2\text{Cl}_2$ , 26% (QV), 77% (QB); C) TR: h) *N,N*-diphenylformamidine,  $\text{Ac}_2\text{O}$ , 150 °C, 78%; i) carboxymethylated 4-methylquinoline,  $\text{NEt}_3$ ,  $\text{CH}_2\text{Cl}_2$ , 84%; D) Ser(QB)-phosphoramidite: j) PyBOP, NMM, PPTS, DMF, 72%; k) TBAF·3 $\text{H}_2\text{O}$ , THF, 54%; l) 2-cyanoethyl-*N,N*-diisopropylchloro phosphoramidite,  $\text{EtNiPr}_2$ ,  $\text{CH}_2\text{Cl}_2$ , 75%.

### DMTr-Ser-OH (S4)

(*R*)-2-Amino-3-dimethoxytritylpropane-1-ol (**DMTr-Ser-OH**) prepared according to K. S. Ramasamy and W. Seifert, *Bioorg. Med. Chem. Lett.*, 1996, **6**, 1799-1804 within four steps from L-serine in overall 61% yield. Analytical data were identical with those previously published.

### DMTr-Ser(Tfa)-OH (S5)

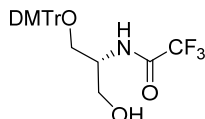

To a solution of (*R*)-2-Amino-3-dimethoxytritylpropane-1-ol (**S4**) (8.50 g, 21.60 mmol, 1.0 eq.) in  $\text{CH}_2\text{Cl}_2$  (50 mL),  $\text{NEt}_3$  (3.05 mL, 21.60 mmol, 1.0 eq.) was added ethyl trifluoroacetate (3.11 mL, 25.92 mmol, 1.2 eq.). After 3 h stirring at room temperature the mixture was diluted with  $\text{CH}_2\text{Cl}_2$  (100 mL) and extracted with sat.  $\text{NaHCO}_3$ -solution (100 mL, 3x). The organic layer was dried over  $\text{Mg}_2\text{SO}_4$ , the solvent was evaporated and the crude product was purified by flash chromatography using a linear gradient of  $\text{cHex/EtOAc/NEt}_3$  (1/1/0.02, v/v/v).

Yield: 8.00 g (16.35 mmol, 76%), yellow oil.

$R_f$  ( $\text{cHex/EtOAc/NEt}_3$ , 1:1:0.01, v/v/v) = 0.63.

$m/z$  (ESI(+)-ICT-HRMS): 512.1654 (100%), (calcd. for  $\text{C}_{26}\text{H}_{26}\text{F}_3\text{NNaO}_5^+$   $[\text{M}+\text{Na}]^+$  512.1655).

$^1\text{H-NMR}$ : (500 MHz,  $\text{CDCl}_3$ )  $\delta$  [ppm] = 7.32 – 7.28 (m, 2H,  $\text{CH}_{\text{aryl}}$ ), 7.24 – 7.13 (m, 7H,  $\text{CH}_{\text{aryl}}$ ), 6.82 (d,  $J$  = 7.9 Hz, 1H, NH), 6.76 (dd,  $J$  = 8.9, 1.1 Hz, 4H,  $\text{CH}_{\text{aryl}}$ ), 4.08 – 3.97 (m, 1H, CH), 3.80 (dd,  $J$  = 11.5, 3.8 Hz, 1H,  $\frac{1}{2}$   $\text{CH}_2\text{ODMTr}$ ), 3.74 – 3.68 (m, 6H, 2xDMTr-OMe), 3.65 (dd,  $J$  = 11.5, 4.6 Hz, 1H,  $\frac{1}{2}$   $\text{CH}_2\text{-ODMTr}$ ), 3.36 – 3.27 (m, 2H,  $\text{CH}_2\text{OH}$ ), 2.11 (s, 1H, OH).

$^{13}\text{C-NMR}$ : (126 MHz,  $\text{CDCl}_3$ )  $\delta$  [ppm] = 158.9 (2x $\text{C}_q\text{-OMe}$ ), 158.7 ( $\text{C}_q$ , C=O), 144.3 (1x $\text{C}_q$ ), 135.4 (2x $\text{C}_q$ ), 130.1 (4x $\text{C}_{\text{aryl}}$ ), 128.2 (2x $\text{C}_{\text{aryl}}$ ), 128.0 (2x $\text{C}_{\text{aryl}}$ ), 127.3 (1x $\text{C}_{\text{aryl}}$ ), 113.5 (4x $\text{C}_{\text{aryl}}$ ), 113.4 (CO- $\text{CF}_3$ ), 87.0 (DMTr- $\text{C}_q$ ), 62.8 ( $\text{CH}_2\text{ODMTr}$ ), 62.6 ( $\text{CH}_2\text{OH}$ ), 55.4 (2xDMTr-OMe), 51.4 (CH).

### DMTr-Ser(Tfa)-phosphoramidite (S6)

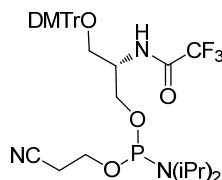

To **S4** (489.5 mg, 1.0 mmol, 1.0 eq.) in  $\text{CH}_2\text{Cl}_2$  (10 mL) were added  $\text{EtN}(\text{iPr})_2$  (680  $\mu\text{L}$ , 4.0 mmol, 4.0 eq.) and 2-cyanoethyl *N,N*-diisopropylchloro phosphoramidite (446  $\mu\text{L}$ , 2.0 mmol, 2.0 eq.). After 30 min stirring at ambient temperature the volatiles were removed in vacuo and the residue was purified by flash chromatography using a linear gradient of cyclohexane/ethyl acetate/pyridine (2/1/0.02, v/v/v).

Yield: 503 mg (0.73 mmol, 73%), colourless oil.

$R_f$  ( $\text{cHex/EtOAc/Pyridine}$ , 2:1:0.01, v/v/v) = 0.62.

$^1\text{H-NMR}$ : (300 MHz,  $\text{CDCl}_3$ )  $\delta$  [ppm] = 7.49 – 7.41 (m, 2H, DMTr), 7.39 – 7.20 (m, 8H, DMTr), 6.91 – 6.85 (m, 4H, DMTr), 6.78 (d,  $J$  = 8.5 Hz, 1H, NH), 4.42 – 4.25 (m, 1H, CH), 4.01 – 3.84 (m, 2H,  $\text{CH}_2\text{-ODMTr}$ ), 3.81 (s, 6H, 2xDMTr-OMe), 3.81 – 3.66 (m, 3H,  $\text{CH}_2$ ,  $\frac{1}{2}$ x $\text{CH}_2$ ), 3.58 (ddd,  $J$  = 13.3, 10.4, 6.7 Hz, 2H,  $\text{CH}_2$ ), 3.49 – 3.36 (m, 1H,  $\frac{1}{2}$  $\text{CH}_2$ ), 3.34 – 3.20 (m, 1H,  $\frac{1}{2}$  $\text{CH}_2$ ), 2.63 – 2.51 (m, 2H,  $\text{CH}_2\text{-CN}$ ), 1.26 – 1.11 (m, 12H, 4x $\text{CH}_3(\text{N}(\text{iPr})_2)$ ).

$^{19}\text{F-NMR}$ : (282 MHz,  $\text{CDCl}_3$ )  $\delta$  [ppm] = -76.10, -76.15 ( $\text{CF}_3$ , two diastereomers).

$^{31}\text{P-NMR}$ : (121 MHz,  $\text{CDCl}_3$ )  $\delta$  [ppm] = 149.47, 149.45 (P(III), two diastereomers).

### Quinoline Violet (QV, S11)

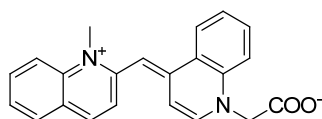

*N*-Methyl-2-chlorquinolinium iodide (synthesized according to R. Lartia, U. Asseline, *Chem. Eur. J.* **2006**, **12**, 2270-2281) (250 mg, 820  $\mu\text{mol}$ , 1.0 eq.) and *N*-carboxymethyl-4-methquinolinium bromide (280 mg, 984  $\mu\text{mol}$ ,

1.2 eq.) were suspended in  $\text{CH}_2\text{Cl}_2$  (2 mL). After addition of  $\text{NEt}_3$  (400  $\mu\text{L}$ , 2886  $\mu\text{mol}$ , 3.5 eq.) the mixture was stirred at room temperature overnight. The volatiles were removed under vacuum and the residue was purified by flash chromatography ( $\text{CH}_2\text{Cl}_2/\text{MeOH}$ : 8/2, v,v).

Yield: 26%, 73 mg, 213  $\mu\text{mol}$ , violet solid

$m/z$  (ESI(+)-ICT-HRMS): 343.1441  $[\text{M}+\text{H}]^+$  (100%) (calcd. for  $\text{C}_{22}\text{H}_{19}\text{N}_2\text{O}_2^+$ : 343.447), 365.1260  $[\text{M}+\text{Na}]^+$  (50%) (calcd. for  $\text{C}_{22}\text{H}_{18}\text{N}_2\text{O}_2\text{Na}^+$ : 365.1260).

$^1\text{H-NMR}$ : (500 MHz,  $\text{DMSO-d}_6$ )  $\delta$  [ppm] = 8.53 (1H, d,  $J$  = 7.8 Hz), 8.23 (1H, d,  $J$  = 9.4 Hz), 8.12 – 8.04 (3H, m), 7.98 (1H, d,  $J$  = 6.6 Hz), 7.89 – 7.80 (2H, m), 7.69 (1H, d,  $J$  = 8.3 Hz), 7.63 – 7.55 (2H, m), 7.34 (1H, d,  $J$  = 7.4 Hz), 6.59 (1H, s, methine), 5.33 (2H, s,  $\text{CH}_2$ ), 4.10 (2H, s,  $\text{CH}_3$ ).

$^{13}\text{C-NMR}$ : (126 MHz,  $\text{DMSO-d}_6$ )  $\delta$ [ppm] = 169.1 ( $\text{C}_q$ ), 155.1 ( $\text{C}_q$ ), 148.7 ( $\text{C}_q$ ), 143.0 ( $\text{CH}_{\text{aryl}}$ ), 140.5 ( $\text{C}_q$ ), 140.0 ( $\text{C}_q$ ), 138.3 ( $\text{CH}_{\text{aryl}}$ ), 132.8 ( $\text{CH}_{\text{aryl}}$ ), 129.1 ( $\text{CH}_{\text{aryl}}$ ), 125.9 ( $\text{CH}_{\text{aryl}}$ ), 125.6 ( $\text{CH}_{\text{aryl}}$ ), 125.0 ( $\text{C}_q$ ), 123.9 ( $\text{C}_q$ ), 121.8 ( $\text{CH}_{\text{aryl}}$ ), 117.2 ( $\text{CH}_{\text{aryl}}$ ), 117.2 ( $\text{CH}_{\text{aryl}}$ ), 107.5 ( $\text{CH}_{\text{aryl}}$ ), 95.7 (CH), 53.9 ( $\text{CH}_2$ ), 39.5 ( $\text{CH}_3$ ).

### Quinoline Blue (QB, S12)

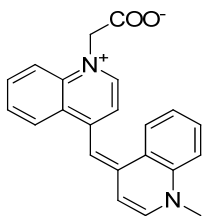

*N*-Methyl-4-chlorquinolinium iodide (synthesized according to R. Lartia, U. Asseline, *Chem. Eur. J.* **2006**, *12*, 2270-2281) (250 mg, 820  $\mu\text{mol}$ , 1.0 eq.) and *N*-carboxymethyl-4-methquinolinium bromide (280 mg, 984  $\mu\text{mol}$ , 1.2 eq.) were suspended in  $\text{CH}_2\text{Cl}_2$  (2 mL). After addition of  $\text{NEt}_3$  (400  $\mu\text{L}$ , 2886  $\mu\text{mol}$ , 3.5 eq.) the mixture was stirred at room temperature overnight. The volatiles were removed under vacuum and the residue was purified by flash chromatography ( $\text{CH}_2\text{Cl}_2/\text{MeOH}$ : 8/2, v,v). Product containing fractions were combined, the solvent was evaporated and the residue was recrystallized from water.

Yield: 77%, 216 mg, 631  $\mu\text{mol}$ , blue solid.

$m/z$  (ESI(+)-ICT-HRMS): 343.1441  $[\text{M}+\text{H}]^+$  (100%) (calcd. for  $\text{C}_{22}\text{H}_{19}\text{N}_2\text{O}_2^+$ : 343.447), 365.1260  $[\text{M}+\text{Na}]^+$  (55%) (calcd. for  $\text{C}_{22}\text{H}_{18}\text{N}_2\text{O}_2\text{Na}^+$ : 365.1260).

$^1\text{H-NMR}$ : (500 MHz,  $\text{DMSO-d}_6$ )  $\delta$  [ppm] = 8.71 (1H, d,  $J$  = 8.6 Hz), 8.64 (1H, dd,  $J$  = 8.7, 1.0 Hz), 8.31 (1H, d,  $J$  = 7.2 Hz), 8.02 (1H, d,  $J$  = 7.4 Hz), 7.98 – 7.92 (2H, m), 7.81 (1H, ddd,  $J$  = 8.5, 7.0, 1.3 Hz), 7.74 (1H, d,  $J$  = 7.2 Hz), 7.70 (1H, ddd,  $J$  = 8.3, 5.9, 2.2 Hz), 7.66 – 7.62 (1H, m), 7.57 (2H, dd,  $J$  = 11.4, 4.1 Hz), 7.27 (s, 1H, methine), 5.23 (s, 2H,  $\text{CH}_2$ ), 4.11 (s, 3H, Me).

$^{13}\text{C-NMR}$ : (126 MHz,  $\text{DMSO-d}_6$ )  $\delta$  169.0 ( $\text{C}_q$ ), 149.9 ( $\text{C}_q$ ), 148.2 ( $\text{C}_q$ ), 144.1 ( $\text{CH}_{\text{aryl}}$ ), 143.0 ( $\text{CH}_{\text{aryl}}$ ), 138.6 ( $\text{C}_q$ ), 138.4 ( $\text{C}_q$ ), 133.0 ( $\text{CH}_{\text{aryl}}$ ), 132.5 ( $\text{CH}_{\text{aryl}}$ ), 126.6 ( $\text{CH}_{\text{aryl}}$ ), 125.9 ( $\text{CH}_{\text{aryl}}$ ), 125.8 ( $\text{CH}_{\text{aryl}}$ ), 125.7 ( $\text{CH}_{\text{aryl}}$ ), 125.4 ( $\text{C}_q$ ), 124.7 ( $\text{C}_q$ ), 117.9 ( $\text{CH}_{\text{aryl}}$ ), 117.1 ( $\text{CH}_{\text{aryl}}$ ), 109.8 ( $\text{CH}_{\text{aryl}}$ ), 107.7 ( $\text{CH}_{\text{aryl}}$ ), 96.9 (CH), 54.6 ( $\text{CH}_2$ ), 42.1 ( $\text{CH}_3$ ).

### Thiazole Red (TR, S15)

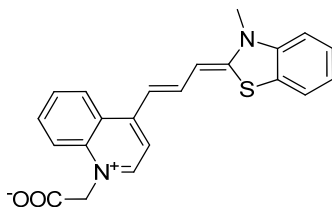

To a suspension of *N*-Carboxymethyl-4-methquinolinium bromide (1.52 mg, 5.36  $\mu\text{mol}$ , 1.0 eq.) and hemicyanine **S14** (synthesized according to S. Ikeda, H. Yanagisawa, A. Nakamura, D. O. Wang, M. Yuki, A. Okamoto, *Org. Biomol. Chem.* **2011**, *9*, 4199-4204) (2.34 g, 5.36  $\mu\text{mol}$ , 1.0 eq.) in  $\text{CH}_2\text{Cl}_2$  (100 mL) was added  $\text{NEt}_3$  (7.6 mL, 54.3  $\mu\text{mol}$ , 10 eq.). The resulting blue suspension was stirred at room temperature overnight. The blue solid was filtered off, washed twice with  $\text{CH}_2\text{Cl}_2$  (20 mL) and dried under vacuum.

Yield: 84%, 1.68 g, 4.50 mmol), blue solid.

*m/z* (ESI(+)-ICT-HRMS): 375.1161 (100%) [M+H]<sup>+</sup> (calcd. for C<sub>22</sub>H<sub>19</sub>O<sub>2</sub>N<sub>2</sub>S<sup>+</sup>: 375.1162).

<sup>1</sup>H-NMR: (500 MHz, DMSO-d<sub>6</sub>) δ [ppm] = 8.38 (1H, d, *J* = 8.7 Hz), 8.24 – 8.15 (2H, m, methine), 7.90 (1H, d, *J* = 7.7 Hz), 7.88 – 7.80 (1H, m), 7.76 (1H, d, *J* = 7.5 Hz), 7.72 (1H, d, *J* = 8.7 Hz), 7.62 (2H, t\*, *J*<sub>app</sub> = 8.8 Hz, quinoline-CH), 7.53 – 7.44 (1H, m), 7.36 – 7.29 (1H, m), 7.07 (1H, d, *J* = 13.1 Hz), 6.59 (1H, d, *J* = 12.6 Hz), 5.37 (2H, s, CH<sub>2</sub>), 3.77 (3H, s, CH<sub>3</sub>).

<sup>13</sup>C-NMR: (126 MHz, DMSO-d<sub>6</sub>) δ [ppm] = 168.8 (CO<sub>2</sub>H), 144.6 (CH), 142.5 (CH), 141.9 (C<sub>q</sub>), 138.7 (C<sub>q</sub>), 133.2 (CH), 128.6 (CH), 127.8 (CH), 126.4 (CH), 125.0 (C<sub>q</sub>), 124.9 (CH), 124.6 (CH), 122.7 (CH), 118.8 (C<sub>q</sub>), 117.4 (CH), 116.5 (C<sub>q</sub>), 114 (C<sub>q</sub>), 113.0 (CH), 109.3 (CH), 108.9 (CH), 100.4 (CH), 54.3 (CH<sub>2</sub>), 33.2 (CH<sub>3</sub>).

#### DMTr-Ser(QB)-OTBS (S17)

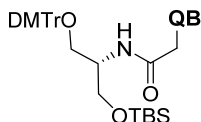

To a suspension of **QB (S12)** (1.21 g, 3.55 mmol, 1.0 eq.) in DMF (50 mL) were added pyridinium *p*-toluene sulfonate (0.90 g, 3.55 mmol, 1.0 eq.), PyBOP (2.23 g, 4.29 mmol, 1.2 eq.) and *N*-methylmorpholine (1.54 mL, 1.42 g, 14.01 mmol, 4.0 eq.). The mixture was stirred for 2 min, which provided a clear solution. Subsequently, a solution of **S16** (prepared according to L. Bethge, I. Singh and O. Seitz, *Org. Biomol. Chem.*, 2010, **8**, 2439-2448.) (1.80 g, 3.55 mmol, 1.0 eq.) in DMF (10 mL) was added. The mixture was stirred over night before the solvent was removed under reduced pressure. The remaining blue oil was dissolved in ethyl acetate (100 mL) and washed two times with saturated NaHCO<sub>3</sub> (aq.) solution, dried over MgSO<sub>4</sub> and filtered. After removal of the solvent, the residue was purified by flash chromatography.

Yield: 72%, 2.35 g, 2.57 mmol, blue amorphous solid.

*R<sub>f</sub>* (CH<sub>2</sub>Cl<sub>2</sub>/MeOH/NEt<sub>3</sub>, 89.9/10/0.1, v/v/v) = 0.58.

*m/z* (ESI(+)-ICT-HRMS): 832.4131 (100%) [M]<sup>+</sup> (calcd. for C<sub>52</sub>H<sub>58</sub>N<sub>3</sub>O<sub>5</sub>Si<sup>+</sup>: 832.4140).

<sup>1</sup>H-NMR: (500 MHz, CD<sub>3</sub>CN,) δ [ppm] = 8.44 (1H, d, *J* = 8.0 Hz, H<sub>ArYl</sub>), 8.38 (1H, d, *J* = 7.8 Hz, H<sub>ArYl</sub>), 7.94 (1H, d, *J* = 7.1 Hz, H<sub>ArYl</sub>), 7.89 (1H, ddd, *J* = 8.4, 6.9, 1.3 Hz, H<sub>ArYl</sub>), 7.84 – 7.79 (1H, m, H<sub>ArYl</sub>), 7.66 – 7.60 (2H, m, H<sub>ArYl</sub>), 7.60 – 7.55 (2H, m, H<sub>ArYl</sub>), 7.49 – 7.44 (1H, m, H<sub>ArYl</sub>), 7.44 – 7.37 (4H, m, H<sub>ArYl</sub>), 7.29 – 7.18 (m, 7H, CH-DMTr), 7.09 (1H, s, CH-methine), 6.88 – 6.78 (5H, m, 4xCH-DMTr, NH), 4.87 (2H, d, *J* = 0.9 Hz, CH<sub>2</sub>-CO), 4.13 – 4.05 (1H, m, CH-NH), 4.00 (3H, s, CH<sub>3</sub>), 3.80 – 3.71 (m, 7H, 2xOMe, ½ CH<sub>2</sub>), 3.65 (1H, dd, *J* = 10.2, 6.0 Hz, ½ CH<sub>2</sub>), 3.16 (1H, dd, *J* = 9.1, 5.8 Hz, ½ CH<sub>2</sub>), 3.09 – 3.02 (1H, m, ½ CH<sub>2</sub>), 0.80 (9H, s, Si-*t*Bu), -0.01 (6H, d, *J* = 4.4 Hz, 2xSi-Me).

<sup>13</sup>C-NMR: (126 MHz, CD<sub>3</sub>CN) δ [ppm] = 166.6 (C<sub>q</sub>), 159.6 (C<sub>q</sub>), 152.1 (C<sub>q</sub>), 149.3 (C<sub>q</sub>), 146.2 (C<sub>q</sub>), 144.9 (CH<sub>ArYl</sub>), 143.5 (CH<sub>ArYl</sub>), 139.9 (C<sub>q</sub>), 139.5 (C<sub>q</sub>), 137.1 (C<sub>q</sub>), 136.9 (C<sub>q</sub>), 134.1 (CH<sub>ArYl</sub>), 133.5 (CH<sub>ArYl</sub>), 131.0 (CH<sub>ArYl</sub>), 131.0 (CH<sub>ArYl</sub>), 128.9 (CH<sub>ArYl</sub>), 128.8 (CH<sub>ArYl</sub>), 127.8 (CH<sub>ArYl</sub>), 127.7 (CH<sub>ArYl</sub>), 126.8 (C<sub>q</sub>), 126.7 (CH<sub>ArYl</sub>), 126.7 (CH<sub>ArYl</sub>), 126.6 (CH<sub>ArYl</sub>), 125.9 (C<sub>q</sub>), 118.6 (CH<sub>ArYl</sub>), 117.5 (CH<sub>ArYl</sub>), 114.0 (CH<sub>ArYl</sub>), 114.0 (CH<sub>ArYl</sub>), 111.4 (CH<sub>ArYl</sub>), 108.6 (CH<sub>ArYl</sub>), 98.8 (CH-methine), 86.8 (CH<sub>q</sub>), 62.7 (2xCH<sub>2</sub>), 56.8 (CH<sub>2</sub>CO), 55.9 (2xOMe), 52.4 (CH), 43.3 (N-CH<sub>3</sub>), 26.8 (C<sub>q</sub> Si-*t*Bu), 26.2 (Si-*t*Bu), -5.2, -5.3 (2xSi-Me).

#### DMTr-Ser(QB)-OH (S18)

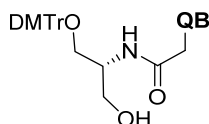

To a solution of **S17** (2.35 g, 2.57 mmol, 1.0 eq.) in THF (50 mL) tetrabutylammonium fluoride trihydrate (1.62 g, 5.14 mmol, 2.0 eq.) was added. After stirring for 1 h, 200 ml of half-saturated aq. NaHCO<sub>3</sub> was added. After stirring for further 15 min the blue precipitate formed was collected by filtration, washed with H<sub>2</sub>O (2x), EtOAc (4x) and Et<sub>2</sub>O (2x) and finally dried under reduced pressure to yield a fine blue powder.

Yield: 54%, 1.18 g, 1.39 mmol, blue solid.

*m/z* (ESI(+)-ICT-HRMS): 718.3272 (100%) [M]<sup>+</sup> (calcd. for C<sub>46</sub>H<sub>44</sub>N<sub>3</sub>O<sub>5</sub><sup>+</sup>: 718.3275).

<sup>1</sup>H-NMR: (500 MHz, CD<sub>3</sub>CN) δ [ppm] = 8.47 (1H, d, *J* = 8.6 Hz, H<sub>Aryl</sub>), 8.42 (1H, d, *J* = 8.5 Hz, H<sub>Aryl</sub>), 7.96 (1H; d, *J* = 7.1 Hz, H<sub>Aryl</sub>), 7.90 (1H, ddd, *J* = 8.3, 6.9, 1.3 Hz, H<sub>Aryl</sub>), 7.84 (1H, d, *J* = 8.7 Hz, H<sub>Aryl</sub>), 7.68 – 7.55 (4H, m, H<sub>Aryl</sub>), 7.51 – 7.41 (3H, m, H<sub>Aryl</sub>), 7.38 (2H, dt, *J* = 8.4, 1.8 Hz, H<sub>Aryl</sub>), 7.31 – 7.19 (7H, m, DMTr), 7.13 (1H, s, CH-Methin), 6.93 (1H, d, *J* = 8.6 Hz, NH), 6.85 – 6.79 (4H, m, DMTr), 4.88 (2H, s, CH<sub>2</sub>CO), 4.10 – 4.03 (1H, m, CH), 4.03 (3H, s, N-Me), 3.74 (6H, d, *J* = 0.7 Hz, 2xOMe), 3.62 (2H, ddd, *J* = 21.6, 11.0, 5.5 Hz, CH<sub>2</sub>), 3.13 (1H, dd, *J* = 9.3, 5.6 Hz, ½ CH<sub>2</sub>), 3.07 (1H, dd, *J* = 9.3, 5.1 Hz, ½ CH<sub>2</sub>), 2.96 (1H, d, *J* = 5.2 Hz, CH<sub>2</sub>OH).

<sup>13</sup>C-NMR: (126 MHz, CD<sub>3</sub>CN) δ [ppm] = 166.8 (C<sub>q</sub>), 159.6 (C<sub>q</sub>), 152.1 (C<sub>q</sub>), 149.5 (C<sub>q</sub>), 146.1 (C<sub>q</sub>), 144.9 (CH<sub>Aryl</sub>), 143.6 (CH<sub>Aryl</sub>), 140.0 (C<sub>q</sub>), 139.6 (C<sub>q</sub>), 137.0 (C<sub>q</sub>), 137.0 (C<sub>q</sub>), 134.1 (CH<sub>Aryl</sub>), 133.5 (CH<sub>Aryl</sub>), 131.0 (CH<sub>Aryl</sub>), 129.0 (CH<sub>Aryl</sub>), 128.8 (CH<sub>Aryl</sub>), 127.8 (CH<sub>Aryl</sub>), 127.7 (CH<sub>Aryl</sub>), 126.7 (CH<sub>Aryl</sub>), 126.6 (CH<sub>Aryl</sub>), 126.0 (C<sub>q</sub>), 118.6 (CH<sub>Aryl</sub>), 117.6 (CH<sub>Aryl</sub>), 114.0 (CH<sub>Aryl</sub>), 111.4 (CH<sub>Aryl</sub>), 108.6 (CH<sub>Aryl</sub>), 98.8 (CH-Methin), 86.9 (C<sub>q</sub>), 63.2 (CH<sub>2</sub>), 62.2 (CH<sub>2</sub>), 56.9 (CH<sub>2</sub>-CO), 55.9 (2xOMe), 52.8 (CH), 43.3 (N-Me).

#### DMTr-Ser(QB)-phosphoramidite (**S19**)

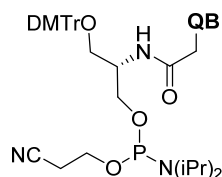

Compound **S18** (253 mg, 0.3 mmol, 1.0 eq.) was twice coevaporated with pyridine (10 mL). Dry CH<sub>2</sub>Cl<sub>2</sub> (6 mL), EtN*i*Pr<sub>2</sub> (300 μL, 1.80 mmol, 6 eq.) and 2-cyanoethyl chloro *N,N*-diisopropyl phosphoramidite (200 μL, 0.90 mmol, 3 eq.) were added. The reaction was monitored by <sup>31</sup>P-NMR. After 30 min of stirring at room temperature the reaction was quenched by addition of saturated NaHCO<sub>3</sub> (aq.) solution. The organic layer was separated and washed two times with saturated NaHCO<sub>3</sub> (aq.) solution, dried over MgSO<sub>4</sub> and filtered. The filtrate was collected and the solvent was evaporated. The crude product was coevaporated twice with dry benzene, dissolved in 20 mL of dry benzene and lyphoyllized to give a fine powder which was dissolved in dry CH<sub>3</sub>CN to a final concentration of 0.15 M and transferred into a reagent bottle for subsequent use in DNA-synthesis.

### 3.) DNA-synthesis and labelling

#### Synthesis of Ser(NH<sub>2</sub>)-oligonucleotides

Ser(NH<sub>2</sub>)-containing oligonucleotides were assembled on 1 μmol scale as described above using the Ser(Tfa)-phosphoramidite (**S6**) at a concentration of 0.1 M in MeCN. Coupling times and cleavage conditions were carried out according to standard DNA-synthesis procedures. During cleavage with aq. ammonia (32%, aq.) the Tfa group on serinol was removed. The Ser(NH<sub>2</sub>)-oligonucleotides were purified by RP-HPLC (see general aspects) with the 5'-DMTr group on. Afterwards, the DMTr group was removed upon treatment with 300 μL of 80% aqueous AcOH for 30 min at room temperature. To the detritylation mixture were added 10 vol% of 1M NaCl (aq.) and 1 mL of *i*PrOH (1 mL). The precipitation was repeated once in order to completely remove AcOH, which might interfere in the following coupling reaction. The final pellet was dissolved in water.

#### Synthesis and coupling of dye-NHS-esters

To the respective dye-carboxylate (20 μmol), pyridinium para-toluene sulfonate (20 μmol) and DMF (1 mL) were added. Ultrasound was applied until the mixture cleared up (5-10 min). *N*-Hydroxysuccinimide (40 μmol) and diisopropylcarbodiimide (40 μmol) were added and the mixture was incubated for 2 h at 30 °C.

In 2 mL-Sarsted®-tubes, oligonucleotides (20 nmol) were dissolved in aqueous NaHCO<sub>3</sub> (0.1 M, 100 μL), the crude solution of activated dye was added (100 μL, 2 μmol, 100 eq.) and the mixture was incubated for 1 h. Isopropanol (1.6 mL) was added, followed by centrifugation (14.000 rpm for 10 min) in order to precipitate the oligonucleotides. The supernatant was discarded and the pellet (containing oligonucleotide and excess reagent) was re-suspended in aqueous ammonium acetate (0.3 M, 150 μL). Isopropanol was added (1 mL), followed by centrifugation (14.000 rpm for 10 min) to obtain a pellet. The supernatant was discarded and the pellet was re-suspended in water, insoluble material was removed by a syringe filter and the mixture was subjected to semi-preparative RP-HPLC purification (5-30% B in 12 min) on an *1105 HPLC System* from *Gilson* by using a *Waters X-Bridge BEH130 C18 (4.6x250mm, 5 μm)* column with binary mixture of A (0.1 M triethylammonium acetate, aq. pH 7.5) and B (MeCN).

Product containing fraction were combined, dried and desalted by precipitation (ammonium acetate/isopropanol) and analysed by RP-HPLC-UV/Vis and MALDI-TOF-MS as mentioned before.



#### 4.) Analytical data *H1N1*-neuraminidase probes

Table S1: Analytical data of BO-labelled *neuraminidase* probes.

|          | sequence, X = Ser(BO)       | MALDI-TOF-MS               |       | R <sub>T</sub> / min |
|----------|-----------------------------|----------------------------|-------|----------------------|
|          |                             | calcd. [M-2H] <sup>+</sup> | found |                      |
| neu-BO-a | GGTTTCXGTTATTATGCCGTTGTATTT | 8412                       | 8415  | 18.2 <sup>a</sup>    |
| neu-BO-b | GGTTTCAXTTATTATGCCGTTGTATTT | 8398                       | 8398  | 9.7 <sup>b</sup>     |
| neu-BO-c | GGTTTCAGXTATTATGCCGTTGTATTT | 8421                       | 8425  | 18.2 <sup>c</sup>    |
| neu-BO-d | GGTTTCAGTXATTATGCCGTTGTATTT | 8423                       | 8422  | 9.74 <sup>c</sup>    |
| neu-BO-e | GGTTTCAGTTXTTATGCCGTTGTATTT | 8412                       | 8416  | 18.17 <sup>a</sup>   |
| neu-BO-f | GGTTTCAGTTAXTATGCCGTTGTATTT | 8423                       | 8423  | 9.72 <sup>b</sup>    |
| neu-BO-g | GGTTTCAGTTATXATGCCGTTGTATTT | 8423                       | 8423  | 9.78 <sup>b</sup>    |
| neu-BO-h | GGTTTCAGTTATTXTGCCGTTGTATTT | 8412                       | 8416  | 18.29 <sup>a</sup>   |
| neu-BO-i | GGTTTCAGTTATTAXGCCGTTGTATTT | 8421                       | 8427  | 18.54 <sup>a</sup>   |
| neu-BO-j | GGTTTCAGTTATTATXCCGTTGTATTT | 8398                       | 8399  | 9.63 <sup>b</sup>    |
| neu-BO-k | GGTTTCAGTTATTATGXCGTTGTATTT | 8436                       | 8439  | 9.62 <sup>b</sup>    |
| neu-BO-l | GGTTTCAGTTATTATGCXGTTGTATTT | 8436                       | 8434  | 1.90 <sup>c</sup>    |
| neu-BO-m | GGTTTCAGTTATTATGCCXTTGTATTT | 8396                       | 8395  | 1.90 <sup>c</sup>    |
| neu-BO-n | GGTTTCAGTTATTATGCCGXGTATTT  | 8423                       | 8422  | 9.6 <sup>b</sup>     |
| neu-BO-o | GGTTTCAGTTATTATGCCGTXGTATTT | 8423                       | 8423  | 9.7 <sup>b</sup>     |

[a] Analytical HPLC-RP-UV, gradient II, [b] analytical HPLC-RP-UV, gradient III, [c] analytical UPLC-RP-UV, gradient I

Please note that different analytical systems were used for the analysis of different probes. In general, the probes show similar retention on RP material.

Analytical HPLC was carried out on an 1105 HPLC System from Gilson by using a Waters X-Bridge BEH130 C18 (4.6x250mm, 5 μm) column or on an Acquity-UPLC®-System from Waters using a binary mixture of A (0.1M triethylammonium acetate, aq. pH 7.5) and B (MeCN).

For analysis via UPLC®-RP-UV a BEH 130 C18-column 1.7 mm (2.1x50mm, 130 Å) from Waters was used at 50 °C. **Gradient I:** 3% B to 30% B in 4 min, 0.6 mL/min.

For analysis via Gilson HPLC-RP-UV a X-Bridge BEH130 C18-column (4.6x250mm, 5 μm) from Waters was used at 55 °C. **Gradient II:** 3% B to 30% B in 20 min, 1.0 mL/min; **gradient III:** 5% B to 35% B in 12 min, 1.5 mL/min.

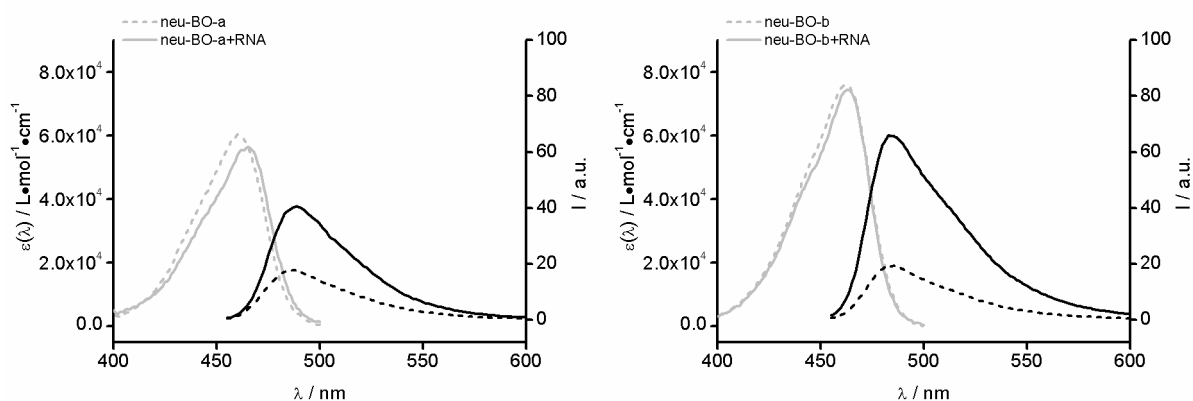

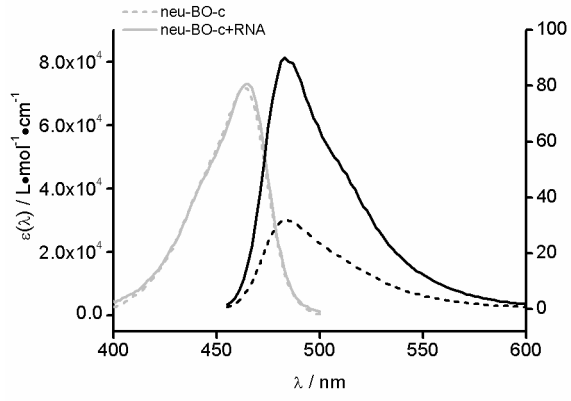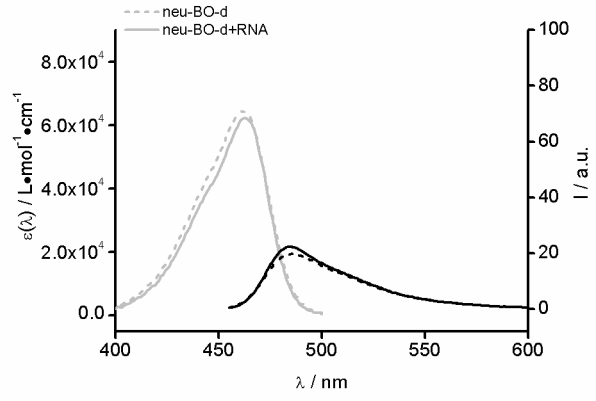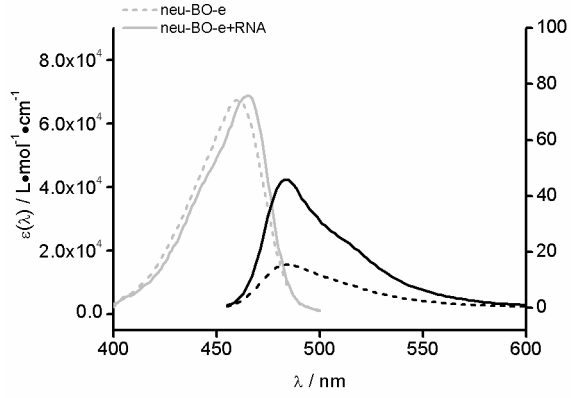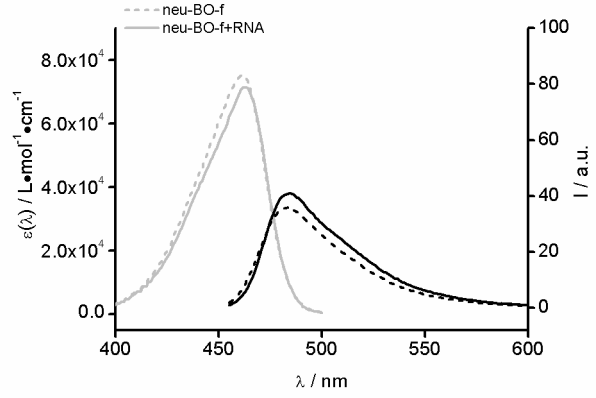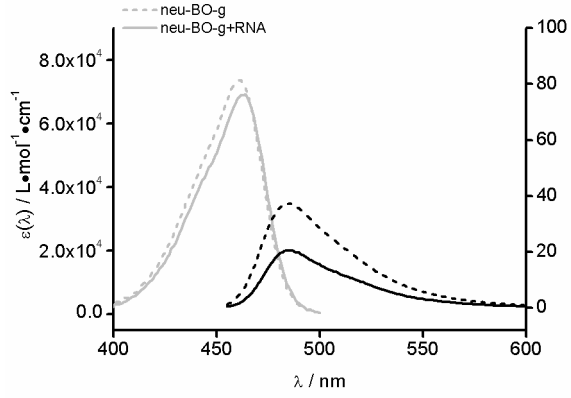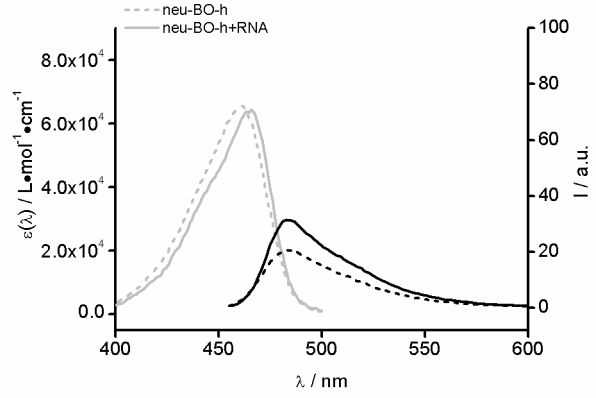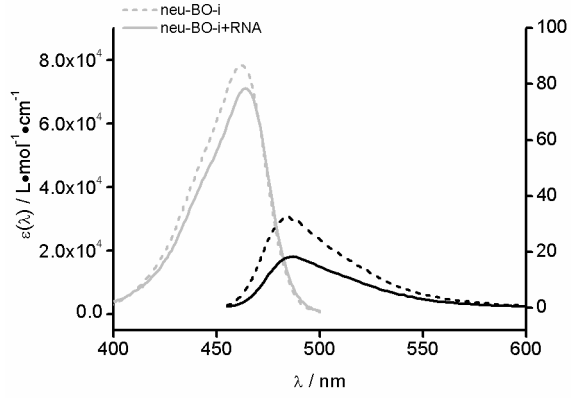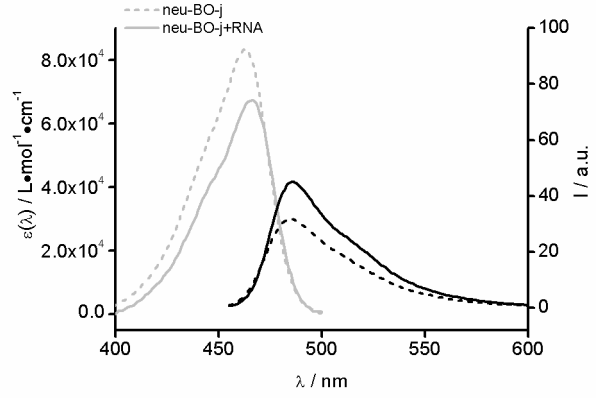

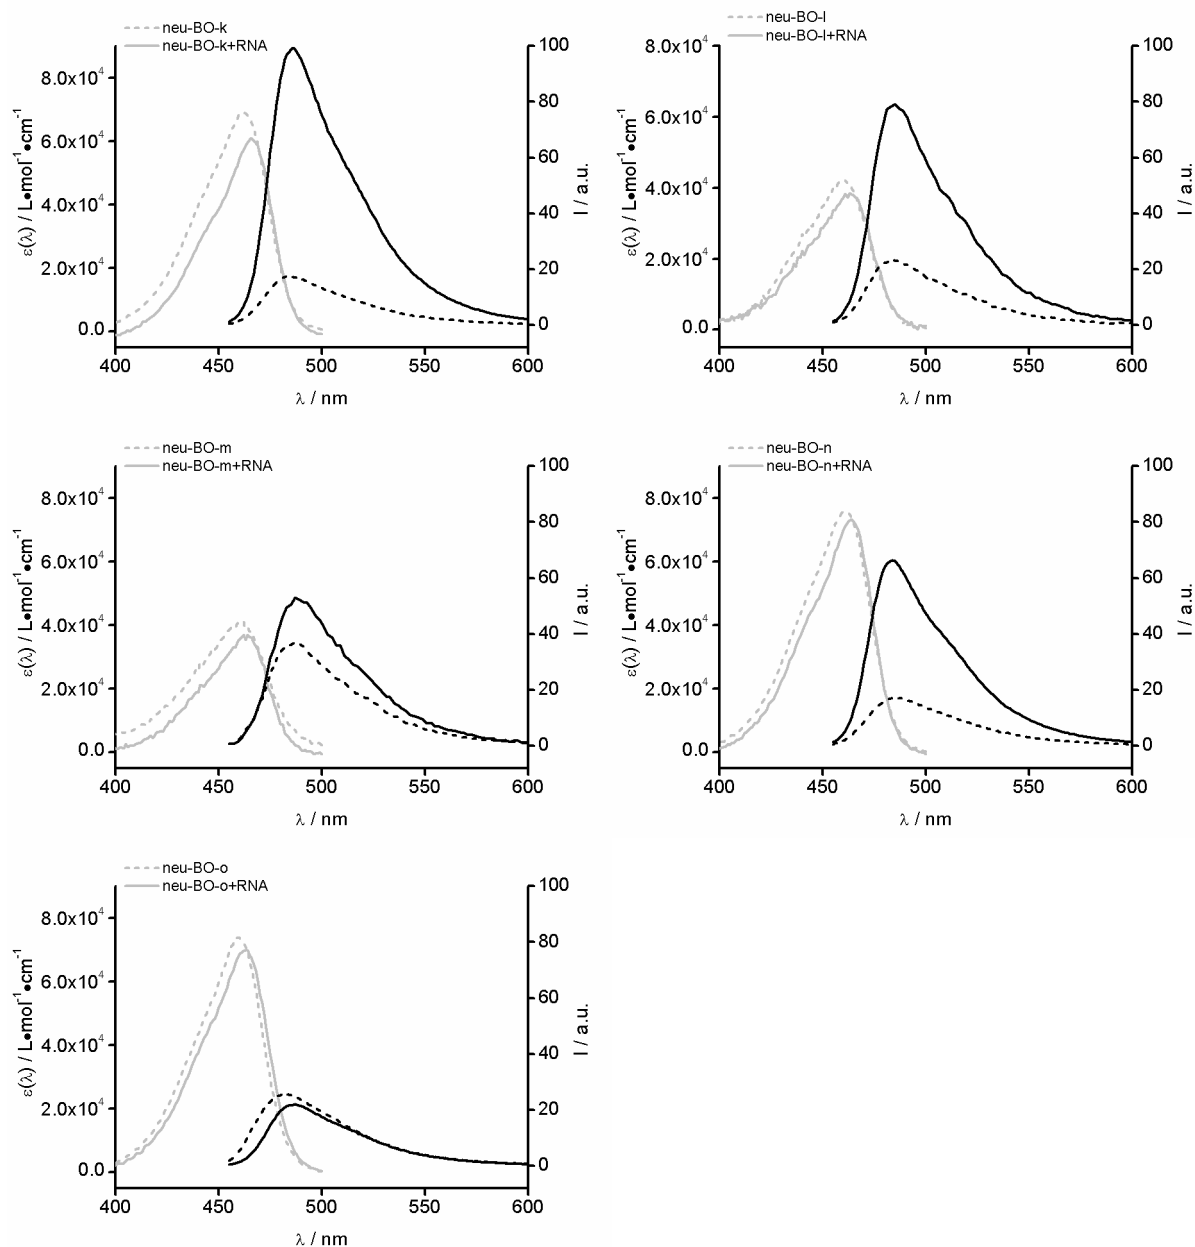

**Figure S1:** Absorption (grey) and emission spectra (black) of BO-labelled neuraminidase-probes in absence (dotted) and presence of complementary RNA target (solid). Conditions: 0.5  $\mu\text{M}$  probe and 5 eq. RNA target when added, in PBS (100 mM NaCl, 10 mM  $\text{Na}_2\text{HPO}_4$ , pH 7), in 1 mL-cuvette (path length = 1 cm);  $\lambda(\text{ex}) = 440$  nm,  $\lambda(\text{em}) = 455\text{-}600$  nm, slit(ex) = 5 nm, slit(em) = 5 nm, 37  $^\circ\text{C}$ .

**Table S2:** Analytical data of TO-labelled *neuraminidase* probes.

|                 | sequence, <b>X = Ser(TO)</b>                                                                                                                 | MALDI-TOF-MS      |       | $R_T / \text{min}^a$ |
|-----------------|----------------------------------------------------------------------------------------------------------------------------------------------|-------------------|-------|----------------------|
|                 |                                                                                                                                              | calcd. $[M-2H]^-$ | found |                      |
| <b>neu-TO-a</b> | GGTTTC <b>X</b> GTTATTATGCCGTTGTATTT                                                                                                         | 8464              | 8463  | 2.08                 |
| <b>neu-TO-b</b> | GGTTTC <b>A</b> XTTATTATGCCGTTGTATTT                                                                                                         | 8448              | 8446  | 2.11                 |
| <b>neu-TO-c</b> | GGTTTC <b>A</b> G <b>X</b> TATTATGCCGTTGTATTT                                                                                                | 8473              | 8471  | 2.04                 |
| <b>neu-TO-d</b> | GGTTTC <b>A</b> G <b>T</b> <b>X</b> ATTATGCCGTTGTATTT                                                                                        | 8473              | 8471  | 2.08                 |
| <b>neu-TO-e</b> | GGTTTC <b>A</b> G <b>T</b> <b>T</b> <b>X</b> TTATGCCGTTGTATTT                                                                                | 8464              | 8463  | 2.14                 |
| <b>neu-TO-f</b> | GGTTTC <b>A</b> G <b>T</b> <b>T</b> <b>A</b> <b>X</b> TATGCCGTTGTATTT                                                                        | 8473              | 8470  | 2.11                 |
| <b>neu-TO-g</b> | GGTTTC <b>A</b> G <b>T</b> <b>T</b> <b>A</b> <b>T</b> <b>X</b> ATGCCGTTGTATTT                                                                | 8473              | 8478  | 2.09                 |
| <b>neu-TO-h</b> | GGTTTC <b>A</b> G <b>T</b> <b>T</b> <b>A</b> <b>T</b> <b>T</b> <b>X</b> TGCCGTTGTATTT                                                        | 8464              | 8460  | 2.12                 |
| <b>neu-TO-i</b> | GGTTTC <b>A</b> G <b>T</b> <b>T</b> <b>A</b> <b>T</b> <b>T</b> <b>A</b> <b>X</b> GCCGTTGTATTT                                                | 8473              | 8469  | 2.11                 |
| <b>neu-TO-j</b> | GGTTTC <b>A</b> G <b>T</b> <b>T</b> <b>A</b> <b>T</b> <b>T</b> <b>A</b> <b>T</b> <b>X</b> CCGTTGTATTT                                        | 8448              | 8444  | 2.09                 |
| <b>neu-TO-k</b> | GGTTTC <b>A</b> G <b>T</b> <b>T</b> <b>A</b> <b>T</b> <b>T</b> <b>A</b> <b>T</b> <b>G</b> <b>X</b> CGTTGTATTT                                | 8488              | 8490  | 2.08                 |
| <b>neu-TO-l</b> | GGTTTC <b>A</b> G <b>T</b> <b>T</b> <b>A</b> <b>T</b> <b>T</b> <b>A</b> <b>T</b> <b>G</b> <b>C</b> <b>X</b> GTTGTATTT                        | 8488              | 8488  | 2.10                 |
| <b>neu-TO-m</b> | GGTTTC <b>A</b> G <b>T</b> <b>T</b> <b>A</b> <b>T</b> <b>T</b> <b>A</b> <b>T</b> <b>G</b> <b>C</b> <b>C</b> <b>X</b> TTGTATTT                | 8448              | 8447  | 2.13                 |
| <b>neu-TO-n</b> | GGTTTC <b>A</b> G <b>T</b> <b>T</b> <b>A</b> <b>T</b> <b>T</b> <b>A</b> <b>T</b> <b>G</b> <b>C</b> <b>C</b> <b>G</b> <b>X</b> TGTATTT        | 8473              | 8476  | 2.08                 |
| <b>neu-TO-o</b> | GGTTTC <b>A</b> G <b>T</b> <b>T</b> <b>A</b> <b>T</b> <b>T</b> <b>A</b> <b>T</b> <b>G</b> <b>C</b> <b>C</b> <b>G</b> <b>T</b> <b>X</b> GATTT | 8473              | 8470  | 2.05                 |

[a] analytical UPLC-RP-UV, gradient I.

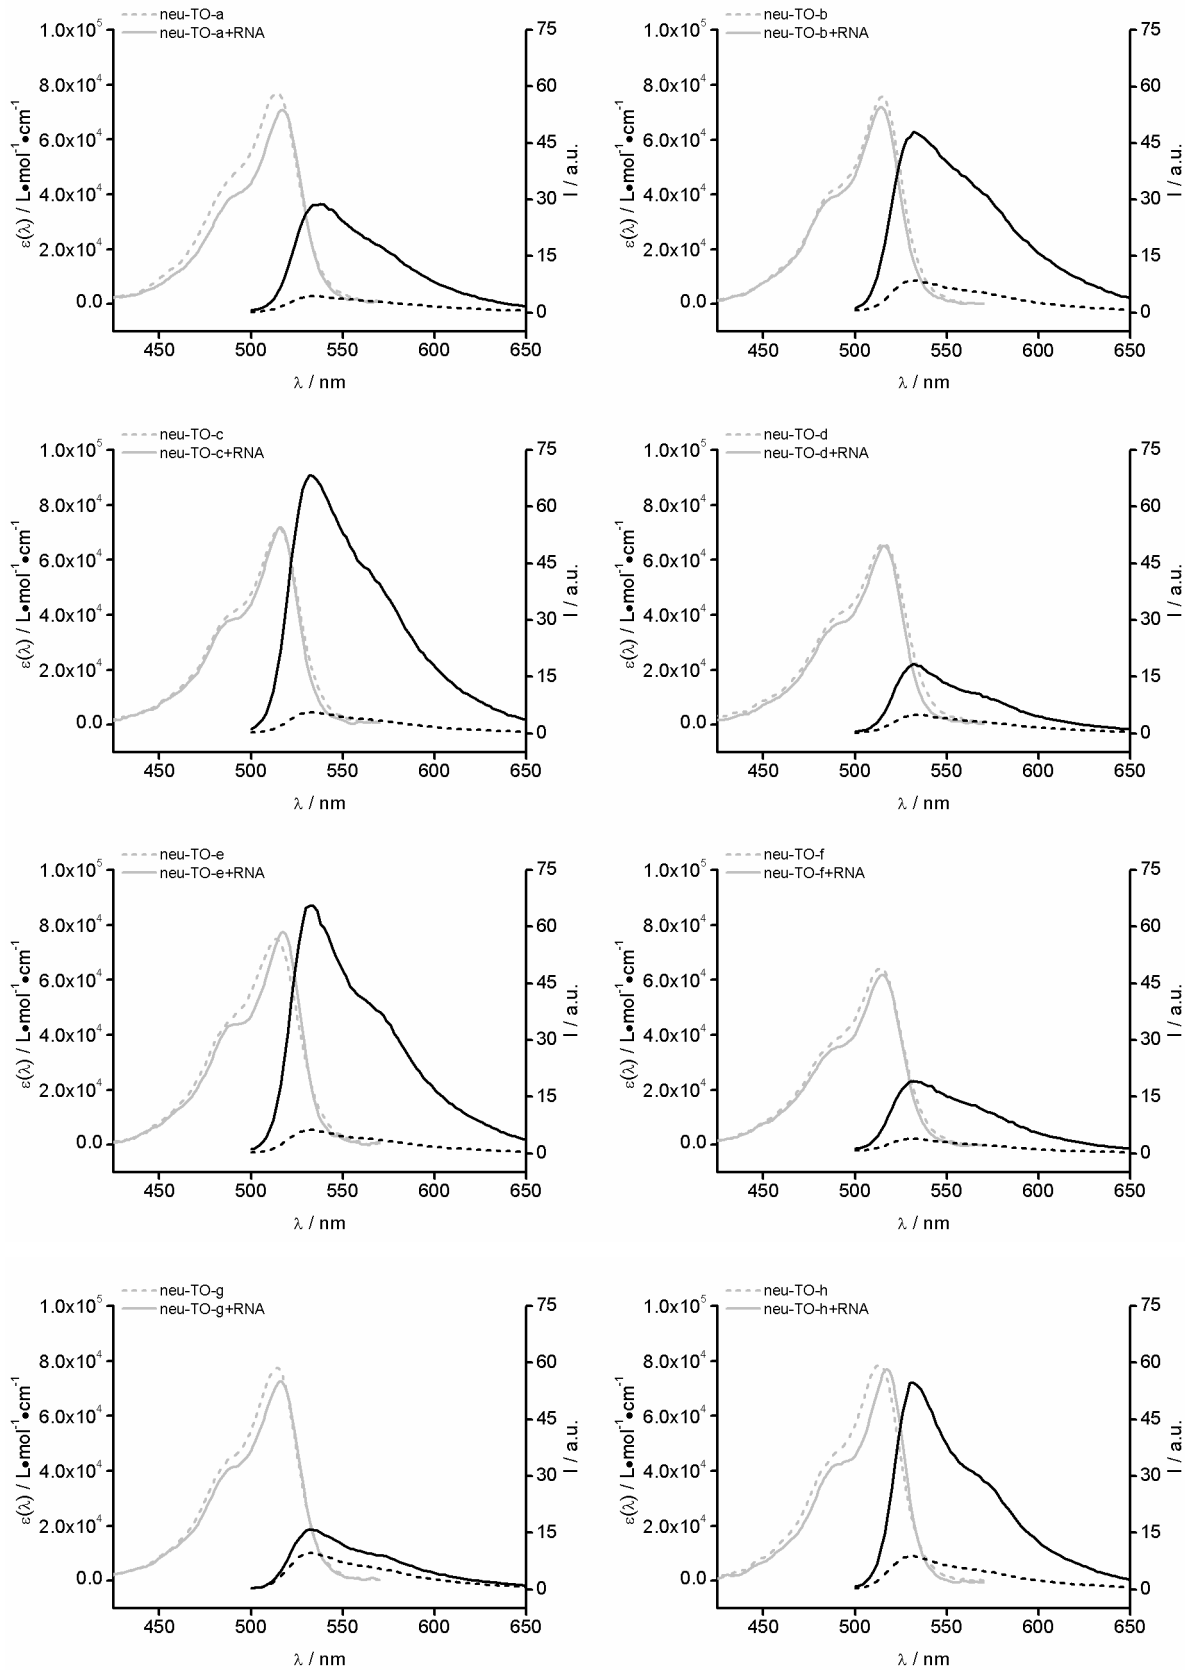

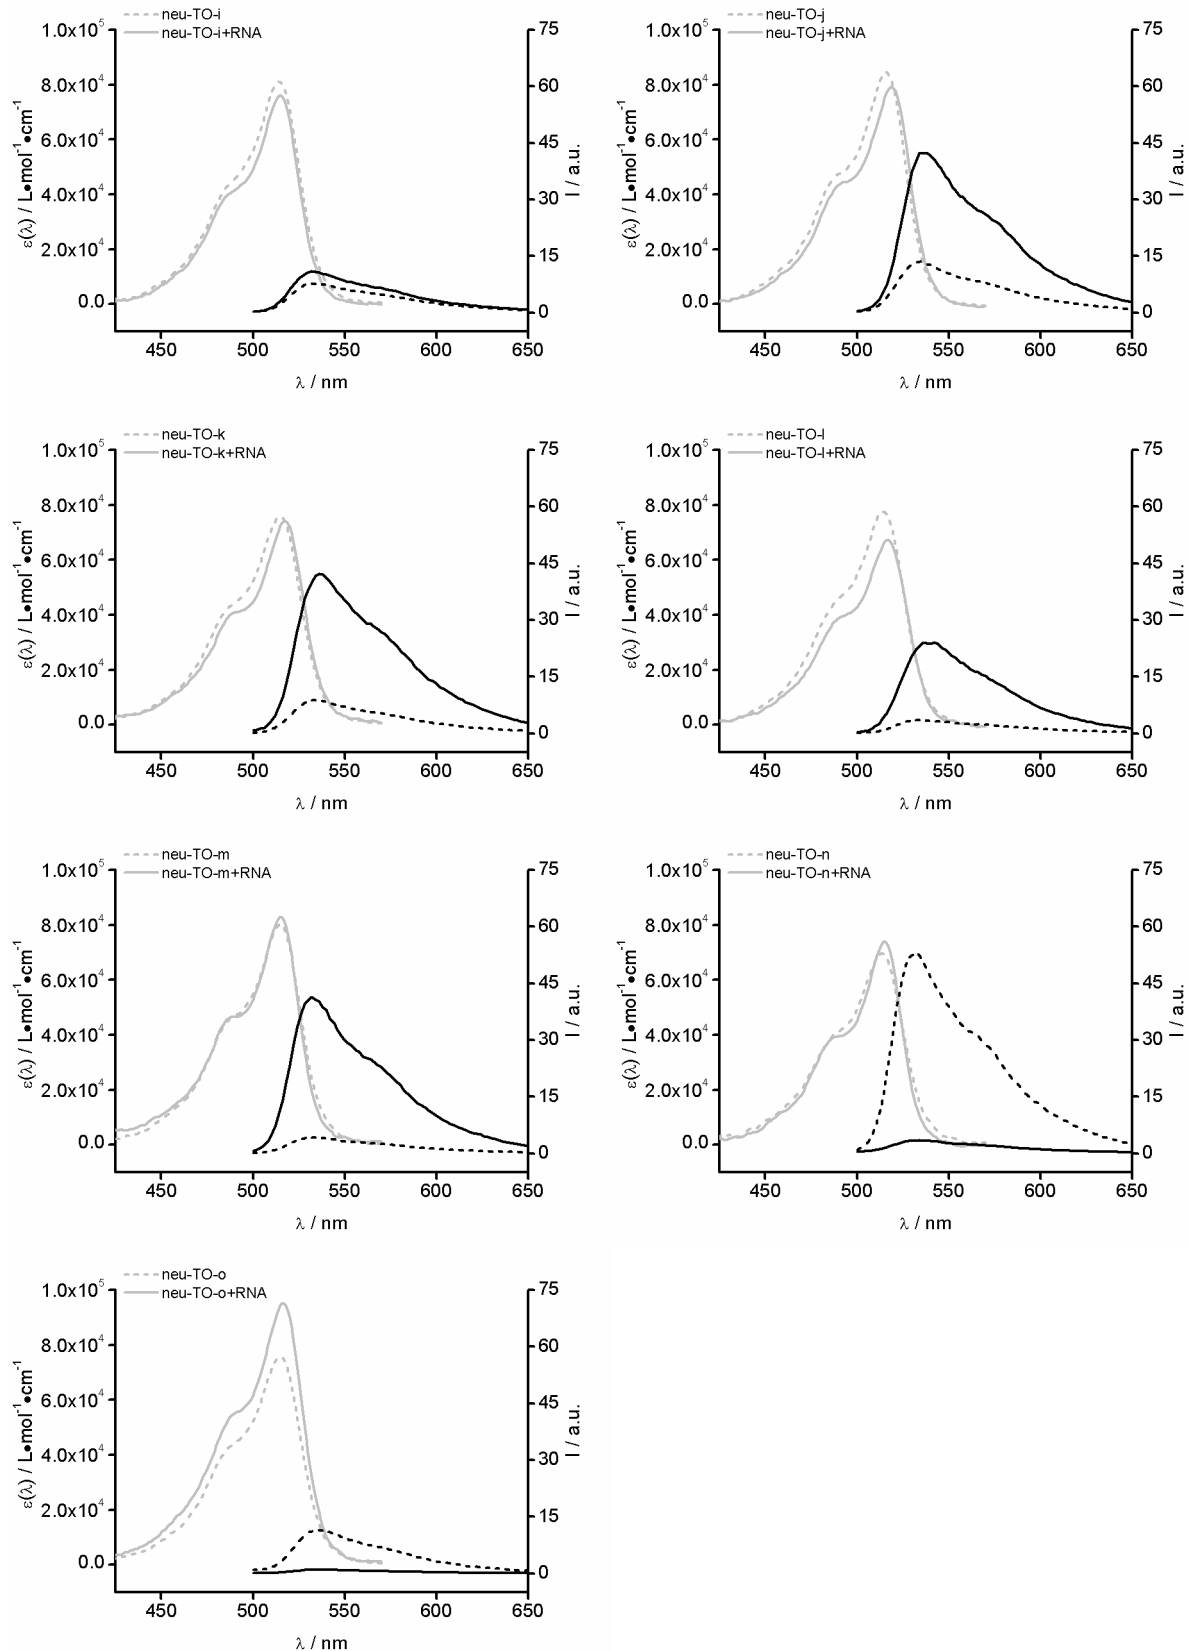

**Figure S2:** Absorption (grey) and emission spectra (black) of TO-labelled neuraminidase-probes in absence (dotted) and presence of complementary RNA target (solid). Conditions: 0.5  $\mu\text{M}$  probe and 5 eq. RNA target when added, in PBS (100 mM NaCl, 10 mM  $\text{Na}_2\text{HPO}_4$ , pH 7), in 1 mL-cuvette (path length = 1 cm);  $\lambda(\text{ex}) = 485 \text{ nm}$ ,  $\lambda(\text{em}) = 500\text{-}660 \text{ nm}$ , slit(ex) = 5 nm, slit(em) = 5 nm, 37  $^\circ\text{C}$ .

Table S3: Analytical data of QV-labelled *neuraminidase* probes.

|          | sequence, X = Ser(QV)       | MALDI-TOF-MS            |       | R <sub>T</sub> / min <sup>a</sup> |
|----------|-----------------------------|-------------------------|-------|-----------------------------------|
|          |                             | calcd. [M] <sup>+</sup> | found |                                   |
| neu-QV-a | GGTTTCXGTTATTATGCCGTTGTATTT | 8458                    | 8454  | 9.1                               |
| neu-QV-b | GGTTTCAXTTATTATGCCGTTGTATTT | 8442                    | 8439  | 9.5                               |
| neu-QV-c | GGTTTCAGXTATTATGCCGTTGTATTT | 8467                    | 8464  | 9.5                               |
| neu-QV-d | GGTTTCAGTXATTATGCCGTTGTATTT | 8467                    | 8466  | 9.7                               |
| neu-QV-e | GGTTTCAGTTXTTATGCCGTTGTATTT | 8458                    | 8461  | 10.0                              |
| neu-QV-f | GGTTTCAGTTAXTATGCCGTTGTATTT | 8467                    | 8465  | 9.8                               |
| neu-QV-g | GGTTTCAGTTATXATGCCGTTGTATTT | 8467                    | 8466  | 9.6                               |
| neu-QV-h | GGTTTCAGTTATTXTGCCGTTGTATTT | 8458                    | 8456  | 9.8                               |
| neu-QV-i | GGTTTCAGTTATTAXGCCGTTGTATTT | 8467                    | 8466  | 9.0                               |
| neu-QV-j | GGTTTCAGTTATTATXCCGTTGTATTT | 8442                    | 8439  | 9.2                               |
| neu-QV-k | GGTTTCAGTTATTATGXCGTTGTATTT | 8482                    | 8480  | 9.1                               |
| neu-QV-l | GGTTTCAGTTATTATGCXGTTGTATTT | 8482                    | 8480  | 9.6                               |
| neu-QV-m | GGTTTCAGTTATTATGCCXTTGTATTT | 8442                    | 8439  | 9.2                               |
| neu-QV-n | GGTTTCAGTTATTATGCCGXTGTATTT | 8467                    | 8465  | 9.3                               |
| neu-QV-o | GGTTTCAGTTATTATGCCGTXGTATTT | 8467                    | 8466  | 9.9                               |

[a] analytical HPLC-RP-UV, gradient III.

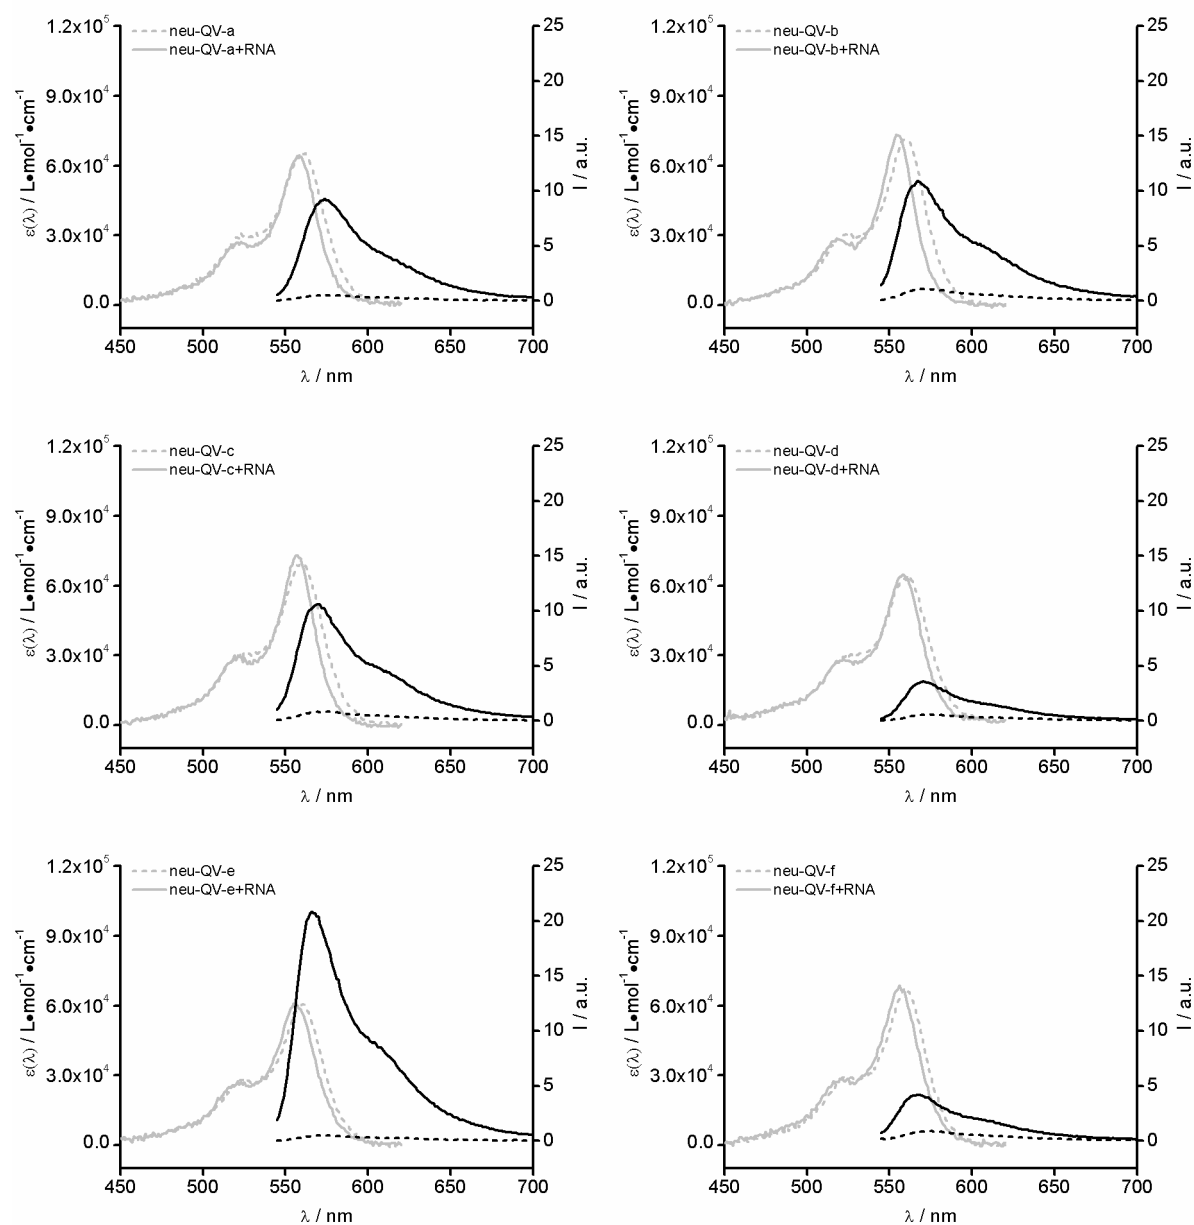

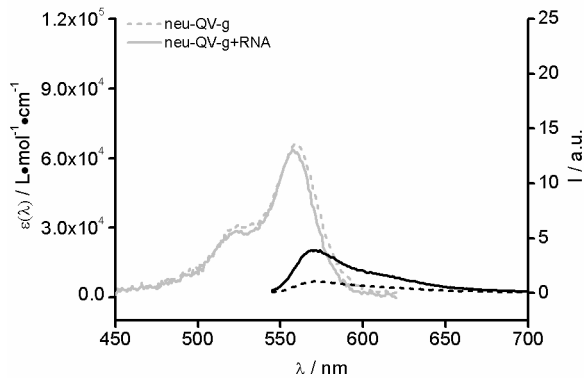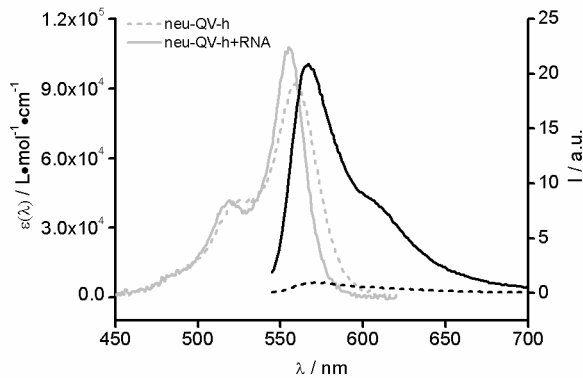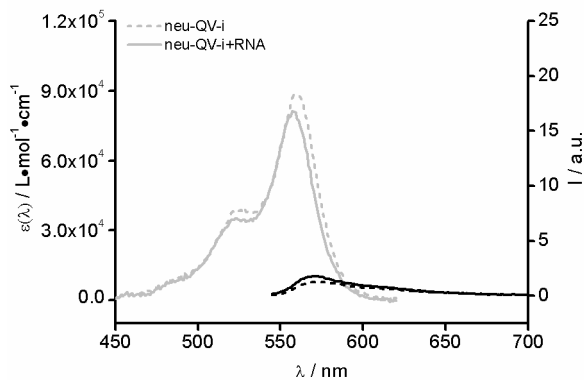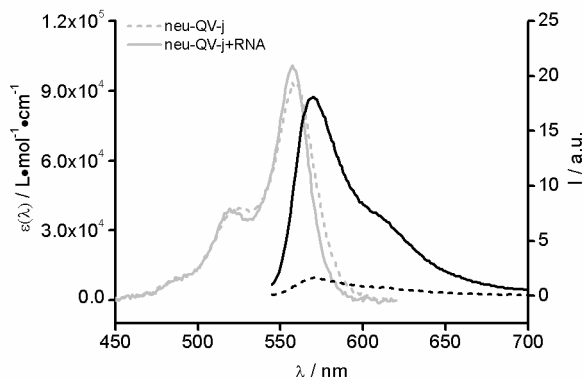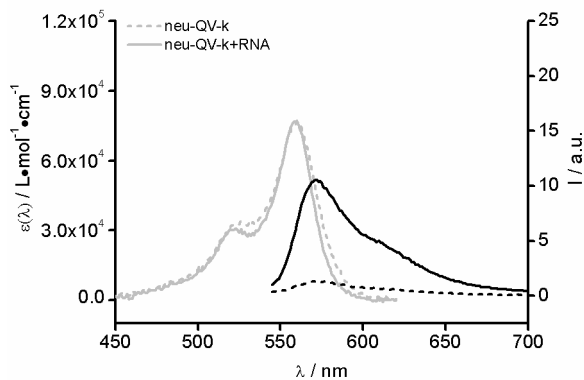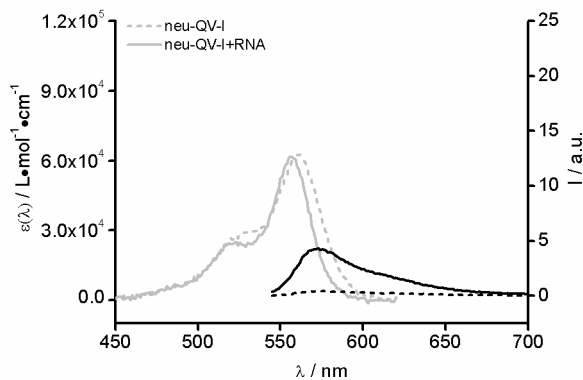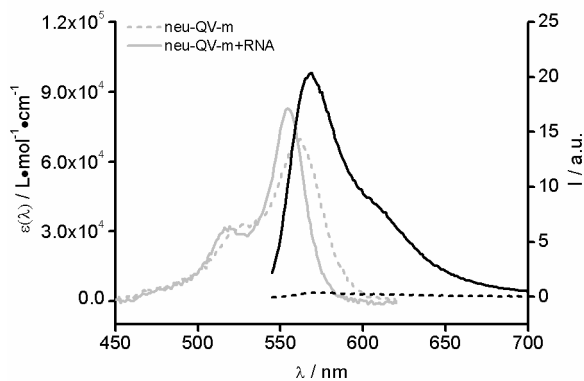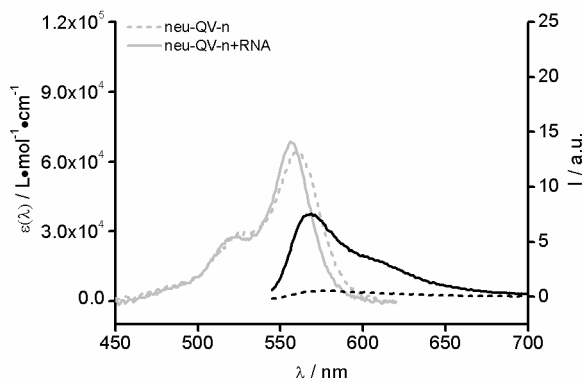



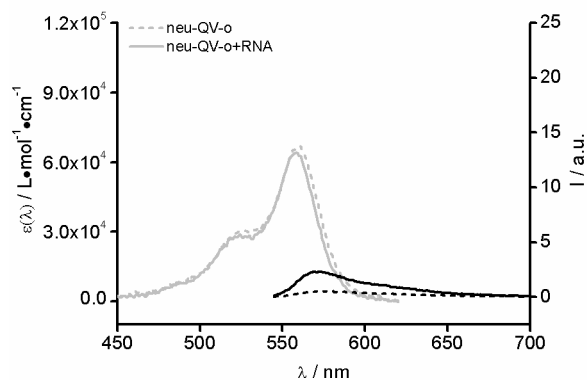

**Figure S3:** Absorption (grey) and emission spectra (black) of QV-labelled neuraminidase-probes in absence (dotted) and presence of complementary RNA target (solid). Conditions: 0.5  $\mu$ M probe and 5 eq. RNA target when added, in PBS (100 mM NaCl, 10 mM Na<sub>2</sub>HPO<sub>4</sub>, pH 7), in 1 mL-cuvette (path length = 1 cm);  $\lambda$ (ex) = 530 nm,  $\lambda$ (em) = 545-700 nm, slit(ex) = 5 nm, slit(em) = 5 nm, 37 °C.

**Table S4:** Analytical data of QB-labelled *neuraminidase* probes.

|                 | sequence, <b>X = Ser(QB)</b>                                                                                                                  | MALDI-TOF-MS            |       | $R_T$ / min <sup>a</sup> |
|-----------------|-----------------------------------------------------------------------------------------------------------------------------------------------|-------------------------|-------|--------------------------|
|                 |                                                                                                                                               | calcd. [M] <sup>+</sup> | found |                          |
| <b>neu-QB-a</b> | GGTTTC <b>X</b> GTTATTATGCCGTTGTATTT                                                                                                          | 8458                    | 8456  | 9.4                      |
| <b>neu-QB-b</b> | GGTTTC <b>A</b> XTTATTATGCCGTTGTATTT                                                                                                          | 8442                    | 8439  | 9.7                      |
| <b>neu-QB-c</b> | GGTTTC <b>A</b> G <b>X</b> TATTATGCCGTTGTATTT                                                                                                 | 8467                    | 8465  | 9.5                      |
| <b>neu-QB-d</b> | GGTTTC <b>A</b> G <b>T</b> <b>X</b> ATTATGCCGTTGTATTT                                                                                         | 8467                    | 8465  | 9.8                      |
| <b>neu-QB-e</b> | GGTTTC <b>A</b> G <b>T</b> <b>T</b> <b>X</b> TTATGCCGTTGTATTT                                                                                 | 8458                    | 8455  | 9.9                      |
| <b>neu-QB-f</b> | GGTTTC <b>A</b> G <b>T</b> <b>T</b> <b>A</b> <b>X</b> TATGCCGTTGTATTT                                                                         | 8467                    | 8465  | 9.5                      |
| <b>neu-QB-g</b> | GGTTTC <b>A</b> G <b>T</b> <b>T</b> <b>A</b> <b>T</b> <b>X</b> ATGCCGTTGTATTT                                                                 | 8467                    | 8468  | 9.8                      |
| <b>neu-QB-h</b> | GGTTTC <b>A</b> G <b>T</b> <b>T</b> <b>A</b> <b>T</b> <b>T</b> <b>X</b> TGCCGTTGTATTT                                                         | 8458                    | 8460  | 9.5                      |
| <b>neu-QB-i</b> | GGTTTC <b>A</b> G <b>T</b> <b>T</b> <b>A</b> <b>T</b> <b>T</b> <b>A</b> <b>X</b> GCCGTTGTATTT                                                 | 8467                    | 8466  | 9.4                      |
| <b>neu-QB-j</b> | GGTTTC <b>A</b> G <b>T</b> <b>T</b> <b>A</b> <b>T</b> <b>T</b> <b>A</b> <b>T</b> <b>X</b> CCGTTGTATTT                                         | 8442                    | 8440  | 9.4                      |
| <b>neu-QB-k</b> | GGTTTC <b>A</b> G <b>T</b> <b>T</b> <b>A</b> <b>T</b> <b>T</b> <b>A</b> <b>T</b> <b>G</b> <b>X</b> CGTTGTATTT                                 | 8482                    | 8480  | 9.8                      |
| <b>neu-QB-l</b> | GGTTTC <b>A</b> G <b>T</b> <b>T</b> <b>A</b> <b>T</b> <b>T</b> <b>A</b> <b>T</b> <b>G</b> <b>C</b> <b>X</b> GTTGTATTT                         | 8482                    | 8481  | 9.9                      |
| <b>neu-QB-m</b> | GGTTTC <b>A</b> G <b>T</b> <b>T</b> <b>A</b> <b>T</b> <b>T</b> <b>A</b> <b>T</b> <b>G</b> <b>C</b> <b>C</b> <b>X</b> TTGTATTT                 | 8442                    | 8441  | 9.5                      |
| <b>neu-QB-n</b> | GGTTTC <b>A</b> G <b>T</b> <b>T</b> <b>A</b> <b>T</b> <b>T</b> <b>A</b> <b>T</b> <b>G</b> <b>C</b> <b>C</b> <b>G</b> <b>X</b> TGTATTT         | 8467                    | 8465  | 9.4                      |
| <b>neu-QB-o</b> | GGTTTC <b>A</b> G <b>T</b> <b>T</b> <b>A</b> <b>T</b> <b>T</b> <b>A</b> <b>T</b> <b>G</b> <b>C</b> <b>C</b> <b>G</b> <b>T</b> <b>X</b> GATTTT | 8467                    | 8466  | 10.0                     |

[a] analytical HPLC-RP-UV, gradient III.

**Table S5:** Fluorescence and absorption data of QB-labelled *neuraminidase* probes.

| neu-        | single strand  |                             |                             |                             | double strand |                |                |                | I/I <sub>0</sub> | Φ/Φ <sub>0</sub> | Δλ / nm |
|-------------|----------------|-----------------------------|-----------------------------|-----------------------------|---------------|----------------|----------------|----------------|------------------|------------------|---------|
|             | I <sub>0</sub> | ε <sub>0</sub> <sup>a</sup> | λ <sub>0</sub> <sup>b</sup> | Φ <sub>0</sub> <sup>c</sup> | I             | ε <sup>a</sup> | λ <sup>b</sup> | Φ <sup>c</sup> |                  |                  |         |
| <b>QB-a</b> | 0.7            | 62                          | 592                         | <b>0.004</b>                | 20            | 58             | 591            | <b>0.13</b>    | <b>28</b>        | <b>29</b>        | 1       |
| <b>QB-b</b> | 1.1            | 79                          | 591                         | <b>0.006</b>                | 28            | 84             | 588            | <b>0.11</b>    | <b>25</b>        | <b>20</b>        | 3       |
| <b>QB-c</b> | 1.6            | 70                          | 593                         | <b>0.008</b>                | 24            | 92             | 586            | <b>0.09</b>    | <b>15</b>        | <b>11</b>        | 7       |
| <b>QB-d</b> | 0.9            | 51                          | 592                         | <b>0.006</b>                | 27            | 76             | 588            | <b>0.13</b>    | <b>30</b>        | <b>22</b>        | 4       |
| <b>QB-e</b> | 0.9            | 75                          | 590                         | <b>0.005</b>                | 58            | 100            | 586            | <b>0.21</b>    | <b>64</b>        | <b>43</b>        | 4       |
| <b>QB-f</b> | 1.1            | 77                          | 596                         | <b>0.005</b>                | 24            | 90             | 586            | <b>0.08</b>    | <b>23</b>        | <b>18</b>        | 10      |
| <b>QB-g</b> | 1.4            | 62                          | 589                         | <b>0.007</b>                | 19            | 64             | 589            | <b>0.11</b>    | <b>14</b>        | <b>15</b>        | 0       |
| <b>QB-h</b> | 0.9            | 55                          | 592                         | <b>0.007</b>                | 38            | 69             | 587            | <b>0.20</b>    | <b>42</b>        | <b>31</b>        | 5       |
| <b>QB-i</b> | 1.4            | 63                          | 590                         | <b>0.008</b>                | 9             | 68             | 592            | <b>0.04</b>    | <b>6</b>         | <b>6</b>         | 2       |
| <b>QB-j</b> | 3.0            | 62                          | 591                         | <b>0.017</b>                | 30            | 69             | 591            | <b>0.14</b>    | <b>10</b>        | <b>9</b>         | 0       |
| <b>QB-k</b> | 1.6            | 87                          | 591                         | <b>0.007</b>                | 21            | 100            | 591            | <b>0.08</b>    | <b>14</b>        | <b>12</b>        | 0       |
| <b>QB-i</b> | 0.7            | 76                          | 595                         | <b>0.004</b>                | 29            | 102            | 588            | <b>0.12</b>    | <b>44</b>        | <b>32</b>        | 7       |
| <b>QB-m</b> | 0.5            | 66                          | 594                         | <b>0.002</b>                | 74            | 107            | 585            | <b>0.24</b>    | <b>152</b>       | <b>102</b>       | 9       |
| <b>QB-n</b> | 0.8            | 70                          | 593                         | <b>0.004</b>                | 25            | 90             | 589            | <b>0.09</b>    | <b>32</b>        | <b>23</b>        | 4       |
| <b>QB-o</b> | 1.2            | 77                          | 590                         | <b>0.006</b>                | 43            | 100            | 590            | <b>0.16</b>    | <b>35</b>        | <b>26</b>        | 0       |

[a] extinction coefficient at absorbance maximum, (in L·mol<sup>-1</sup>·cm<sup>-1</sup>), [b] wavelength of maximum absorbance in the VIS rang. [c] quantum yield, determined by using ATTO 590 as a reference dye.

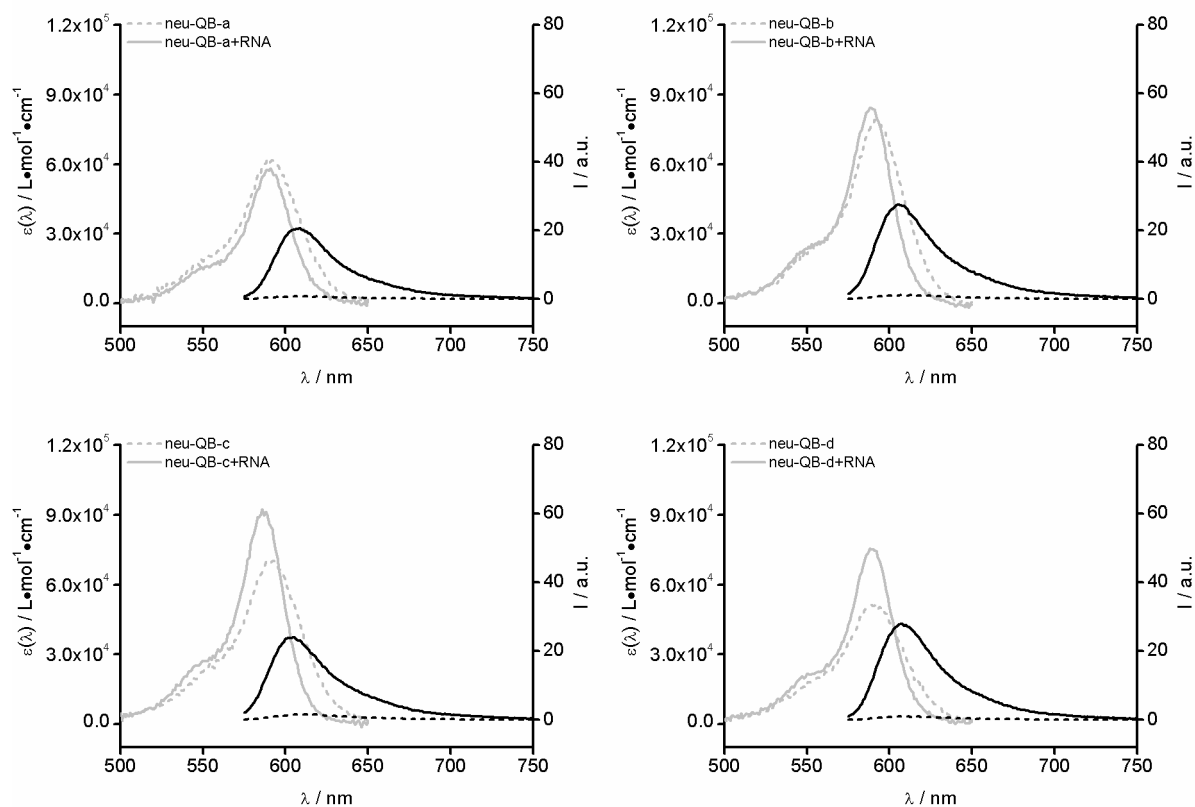

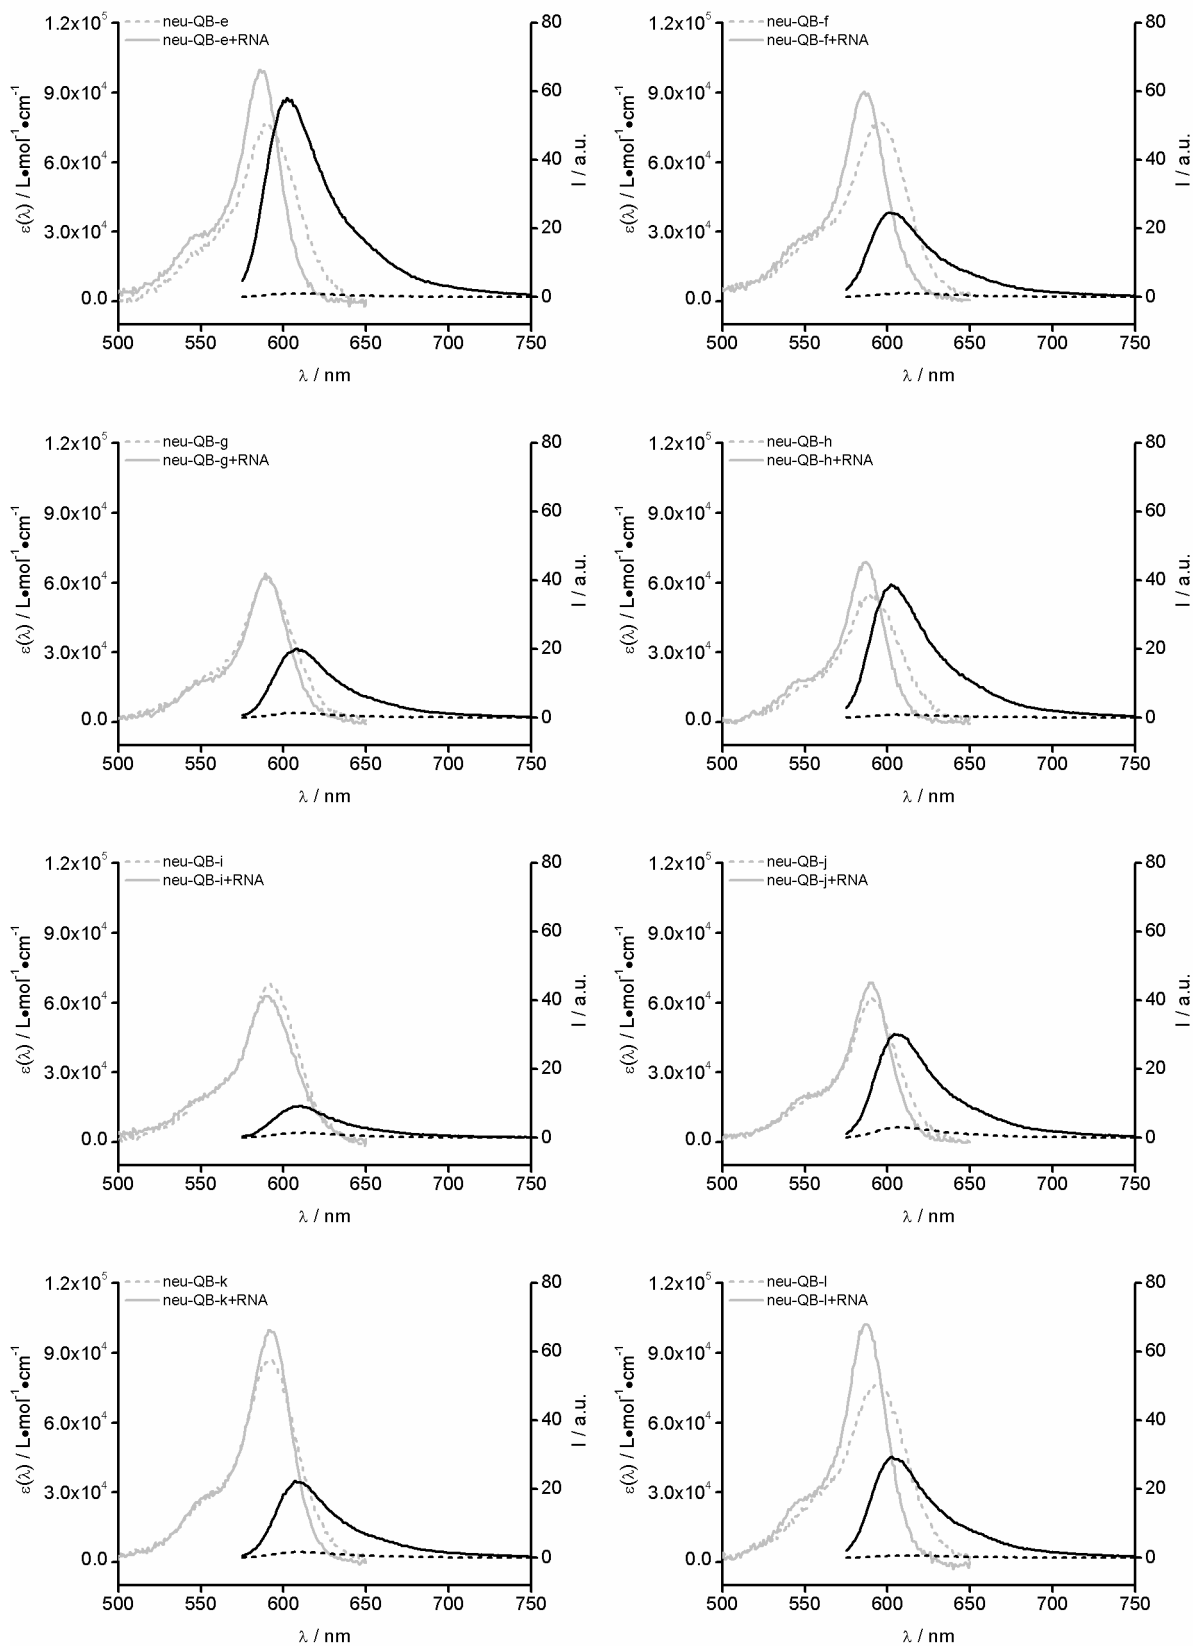

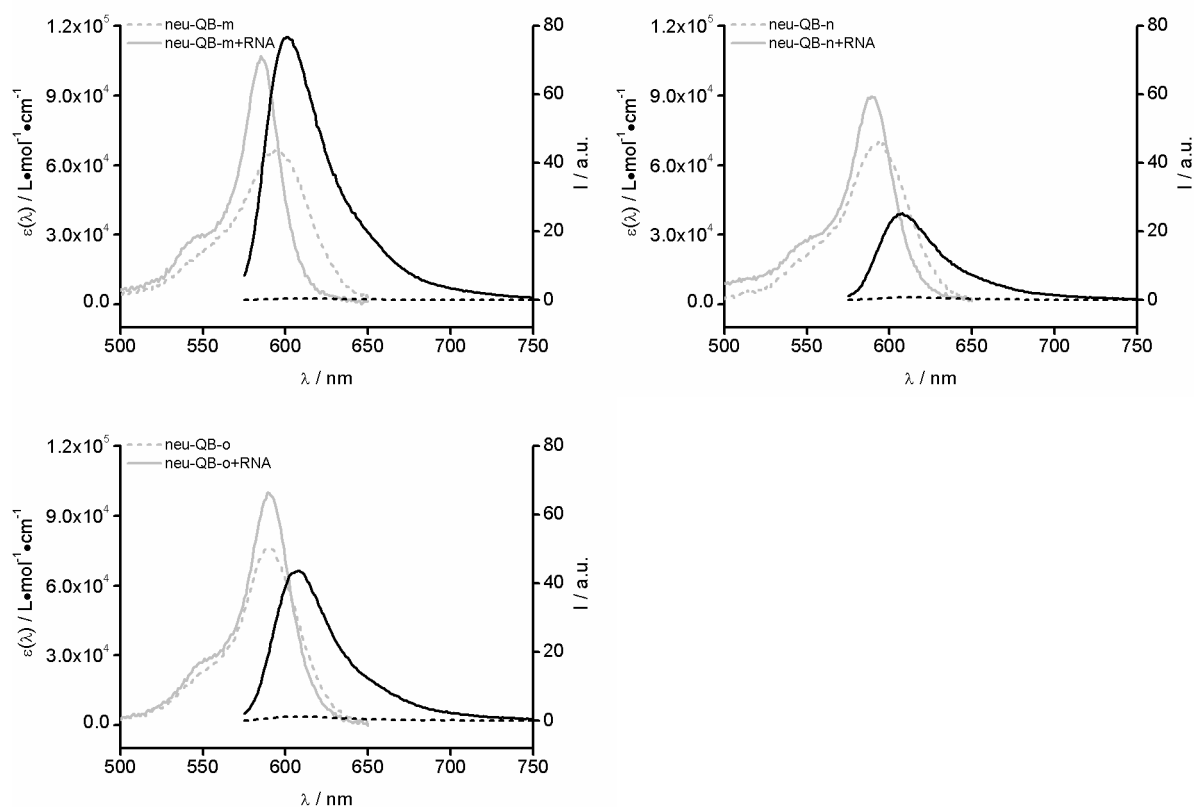

**Figure S4:** Absorption (grey) and emission spectra (black) of QB-labelled neuraminidase-probes in absence (dotted) and presence of complementary RNA target (solid). Conditions: 0.5  $\mu\text{M}$  probe and 5 eq. RNA target when added, in PBS (100 mM NaCl, 10 mM  $\text{Na}_2\text{HPO}_4$ , pH 7), in 1 mL-cuvette (path length = 1 cm);  $\lambda(\text{ex}) = 560$  nm,  $\lambda(\text{em}) = 575\text{-}750$  nm, slit(ex) = 5 nm, slit(em) = 5 nm, 37  $^\circ\text{C}$ .

**Table S6:** Analytical data of TR-labelled *neuraminidase* probes

|          | sequence, <b>X = Ser(TR)</b> | MALDI-TOF-MS          |       | $R_T / \text{min}^a$ |
|----------|------------------------------|-----------------------|-------|----------------------|
|          |                              | calcd. $[\text{M}]^+$ | found |                      |
| neu-TR-a | GGTTTCXGTTATTATGCCGTTGTATTT  | 8490                  | 8489  | 10.1                 |
| neu-TR-b | GGTTTCAXTTATTATGCCGTTGTATTT  | 8474                  | 8470  | 10.2                 |
| neu-TR-c | GGTTTCAGXTATTATGCCGTTGTATTT  | 8499                  | 8497  | 9.9                  |
| neu-TR-d | GGTTTCAGTXATTATGCCGTTGTATTT  | 8499                  | 8498  | 10.1                 |
| neu-TR-e | GGTTTCAGTTXTTATGCCGTTGTATTT  | 8490                  | 8489  | 10.2                 |
| neu-TR-f | GGTTTCAGTTAXTATGCCGTTGTATTT  | 8499                  | 8498  | 10.1                 |
| neu-TR-g | GGTTTCAGTTATXATGCCGTTGTATTT  | 8499                  | 8499  | 10.1                 |
| neu-TR-h | GGTTTCAGTTATTXTGCCGTTGTATTT  | 8490                  | 8487  | 10.2                 |
| neu-TR-i | GGTTTCAGTTATTAXGCCGTTGTATTT  | 8499                  | 8496  | 10.2                 |
| neu-TR-j | GGTTTCAGTTATTATXCCGTTGTATTT  | 8474                  | 8475  | 10.1                 |
| neu-TR-k | GGTTTCAGTTATTATGXC GTTGTATTT | 8514                  | 8514  | 10.0                 |
| neu-TR-l | GGTTTCAGTTATTATGCXGTTGTATTT  | 8514                  | 8516  | 10.0                 |
| neu-TR-m | GGTTTCAGTTATTATGCCXTTGTATTT  | 8474                  | 8475  | 10.2                 |
| neu-TR-n | GGTTTCAGTTATTATGCCGXTGTATTT  | 8499                  | 8497  | 10.1                 |
| neu-TR-o | GGTTTCAGTTATTATGCCGTXTGTATTT | 8499                  | 8498  | 10.1                 |

[a] analytical HPLC-RP-UV, gradient III.

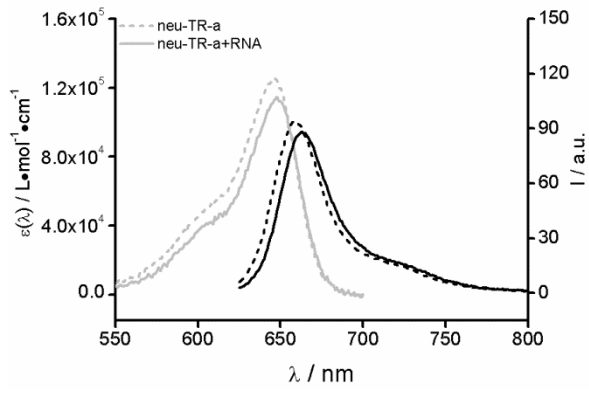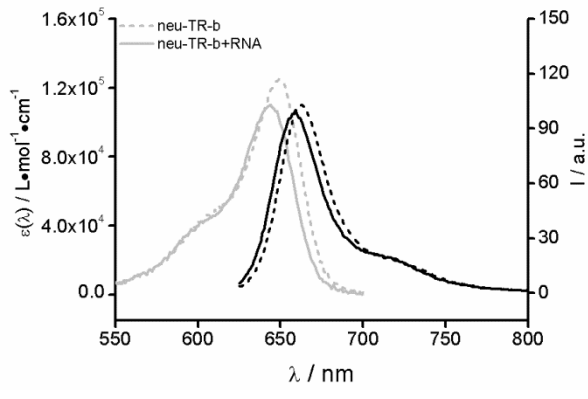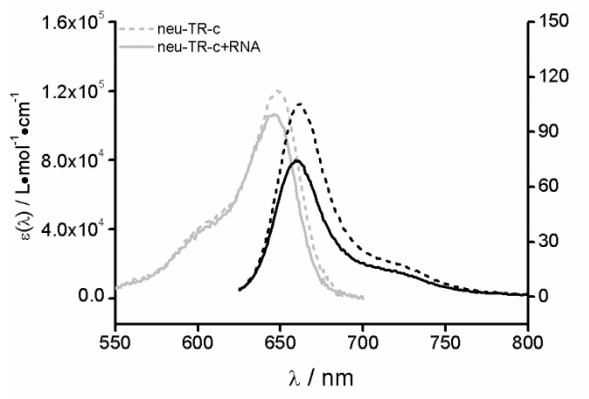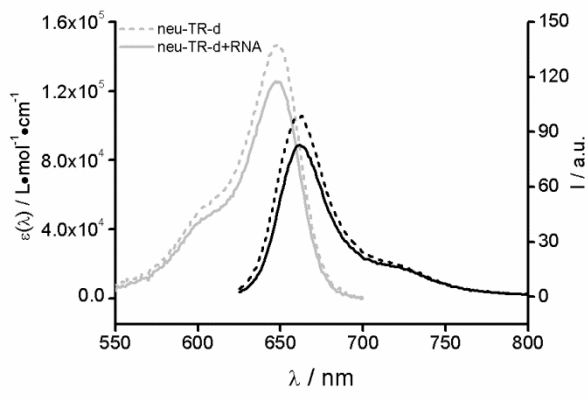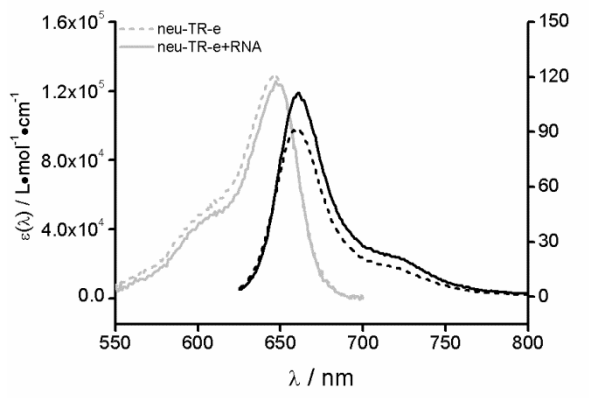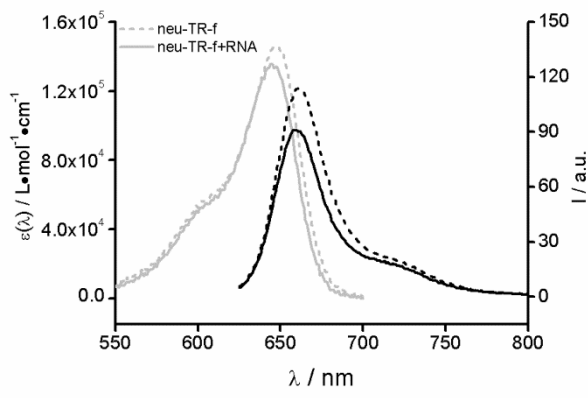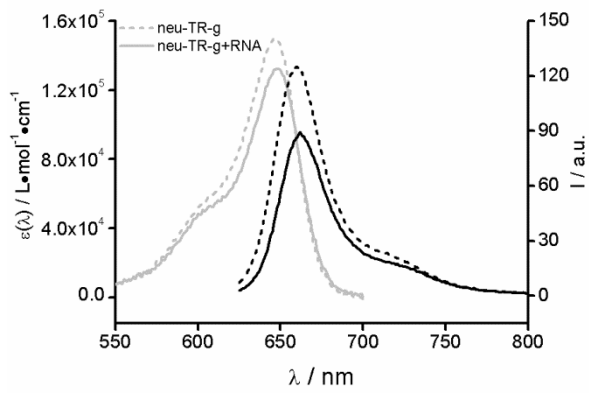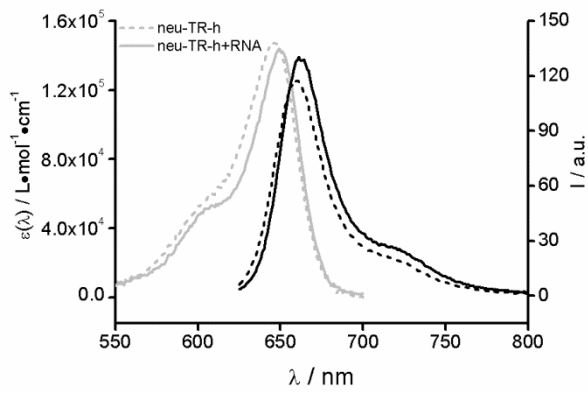

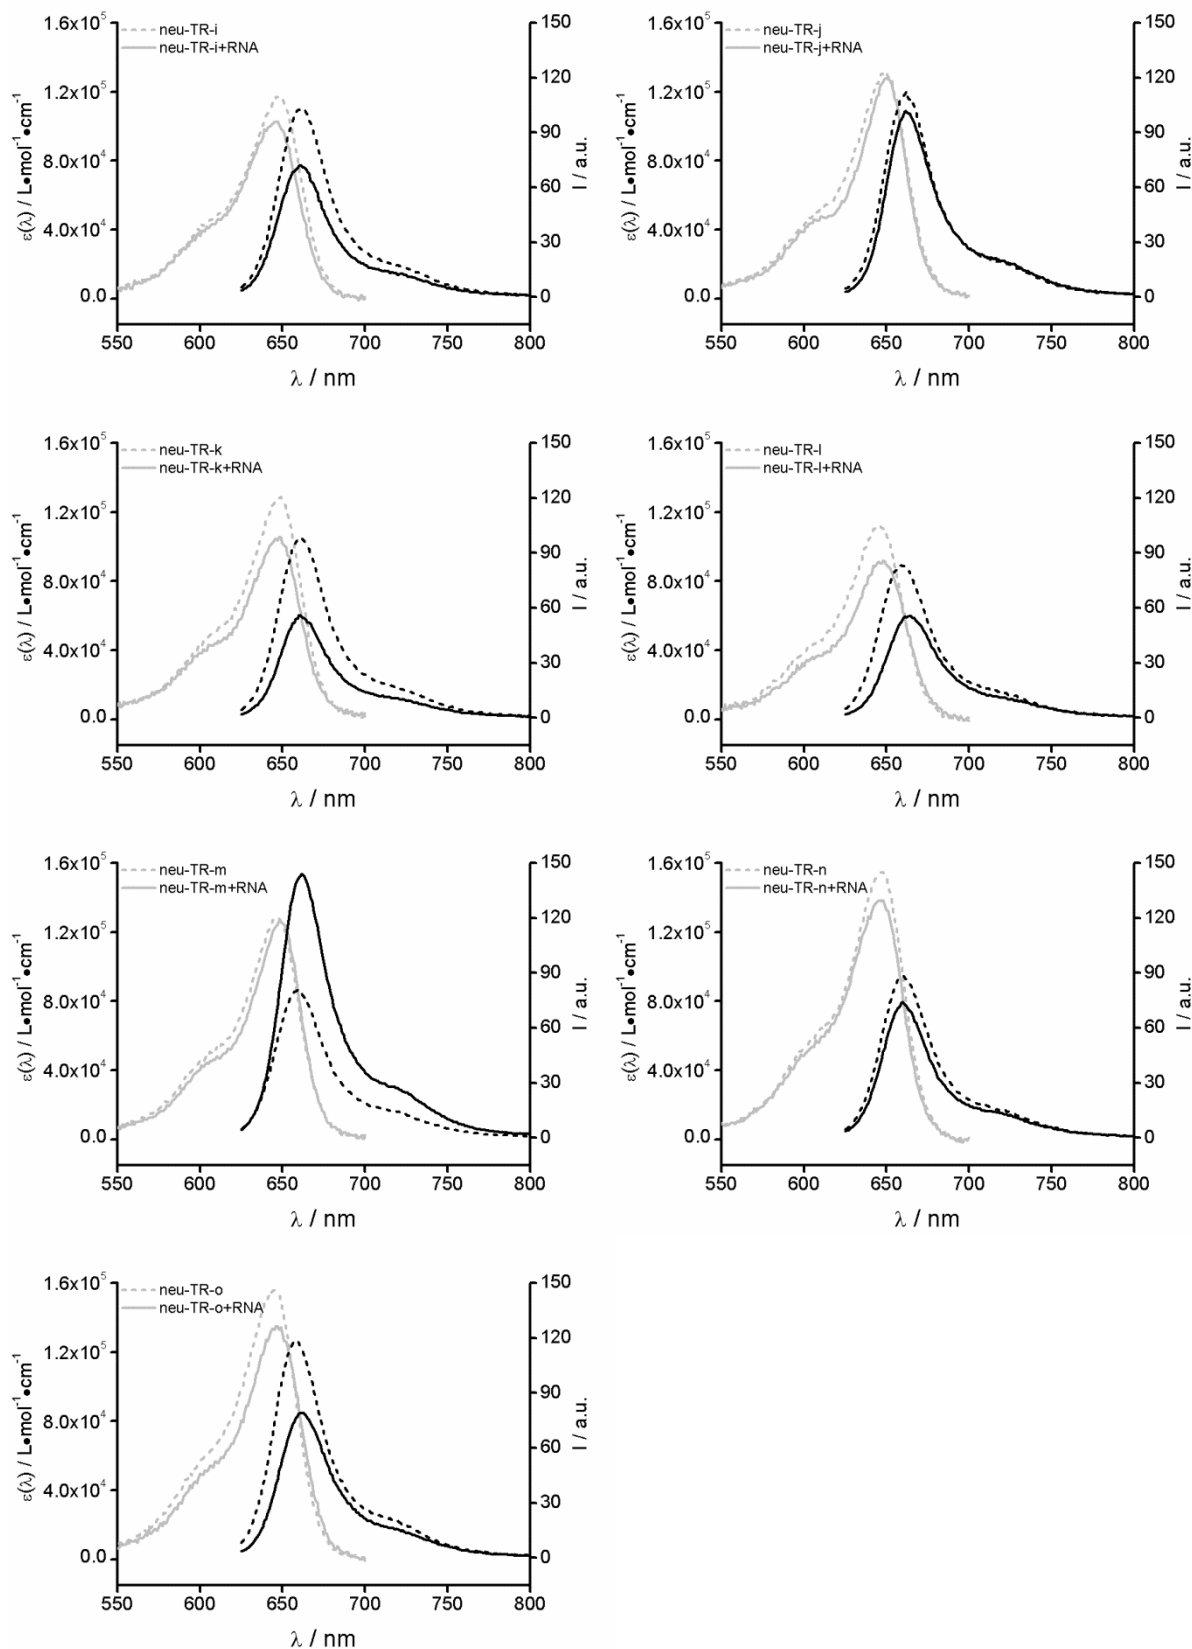

**Figure S5:** Absorption (grey) and emission spectra (black) of TR-labelled neuraminidase-probes in absence (dotted) and presence of complementary RNA target (solid). Conditions: 0.5  $\mu\text{M}$  probe and 5 eq. RNA target when added, in PBS (100 mM NaCl, 10 mM  $\text{Na}_2\text{HPO}_4$ , pH 7), in 1 mL-cuvette (path length = 1 cm);  $\lambda(\text{ex}) = 615$  nm,  $\lambda(\text{em}) = 625\text{-}800$  nm, slit(ex) = 5 nm, slit(em) = 5 nm, 37  $^\circ\text{C}$ .

## 5.) Analytical and fluorescence data of *vasa*-probes

Table S7: analytical data of QB-labelled FIT probes directed against *vasa* mRNA.

| name                | sequence <sup>a</sup> , X = Ser(QB)     | MALDI-TOF-MS            |       | R <sub>T</sub> / min |
|---------------------|-----------------------------------------|-------------------------|-------|----------------------|
|                     |                                         | calcd. [M] <sup>+</sup> | found |                      |
| <b>vasa-QB-1</b>    | <u>UCUAUUUUCXTCAUUUUCA</u>              | 6308                    | 6308  | 8.75 <sup>b</sup>    |
| <b>vasa-QB-2</b>    | <u>UCCAUUUUCXTTAUUUUUCU</u>             | 6299                    | 6300  | 8.91 <sup>b</sup>    |
| <b>vasa-QB-3</b>    | <u>GGCCGCCGUTXTTCCUG</u>                | 5820                    | 5820  | 8.86 <sup>b</sup>    |
| <b>vasa-QB-4</b>    | <u>GGAACUACXTGUUGGGC</u>                | 5903                    | 5903  | 8.53 <sup>b</sup>    |
| <b>vasa-QB-1LNA</b> | <u>UCUAUUUUCXT<sub>L</sub>CAUUUUCA</u>  | 6335                    | 6335  | 10.1 <sup>c</sup>    |
| <b>vasa-QB-2LNA</b> | <u>UCCAUUUUCXT<sub>L</sub>TAUUUUUCU</u> | 6326                    | 6326  | 10.1 <sup>c</sup>    |
| <b>vasa-QB-3LNA</b> | <u>GGCCGCCGUTXT<sub>L</sub>TCCUG</u>    | 5847                    | 5846  | 9.9 <sup>c</sup>     |
| <b>vasa-QB-4LNA</b> | <u>GGAACUACXT<sub>L</sub>GUUGGGC</u>    | 5930                    | 5929  | 9.8 <sup>c</sup>     |

[a] LNA nucleotides are printed in boldface and indicated by subscript "L", 2'-O-Me nucleotides are underlined; [b] analytical HPLC-RP-UV, gradient IV (10-50% B); [c] analytical HPLC-RP-UV, gradient III.

Table S8: Fluorescence data of QB - 2'-O-Me gapmer probes with and without LNA. Conditions: 0.5 μM probe and 5 eq. RNA target when added, in PBS, in 1 mL cuvette (path length = 1 cm); TO: λ(ex) = 485 nm, λ(em) = 500-675 nm, QB: λ(ex) = 560 nm, λ(em) = 575-700 nm, slit(ex) = 5 nm, slit(em) = 5 nm, 37 °C.

| name                | I <sub>0</sub> | I    | I/I <sub>0</sub> | ε(max) <sup>a</sup> | Φ <sub>0</sub> | Φ    | Φ/Φ <sub>0</sub> | Br(560nm) | Br(max) <sup>b</sup> |
|---------------------|----------------|------|------------------|---------------------|----------------|------|------------------|-----------|----------------------|
| <b>vasa-QB-1</b>    | 0.55           | 35.5 | 65               | 71                  | 0.007          | 0.18 | 25.7             | 5.0       | 12.8                 |
| <b>vasa-QB-2</b>    | 0.47           | 32.8 | 70               | 55                  | 0.004          | 0.31 | 77.5             | 4.6       | 17.1                 |
| <b>vasa-QB-3</b>    | 0.85           | 36.5 | 43               | 48                  | 0.006          | 0.27 | 45.0             | 4.9       | 13.0                 |
| <b>vasa-QB-4</b>    | 2.42           | 33.8 | 14               | 67                  | 0.020          | 0.24 | 12.0             | 4.7       | 16.1                 |
| <b>vasa-QB-1LNA</b> | 0.79           | 154  | 195              | 122                 | 0.004          | 0.45 | 112.5            | 19.1      | 54.9                 |
| <b>vasa-QB-2LNA</b> | 2.10           | 151  | 72               | 119                 | 0.009          | 0.47 | 53.5             | 19.1      | 55.9                 |
| <b>vasa-QB-3LNA</b> | 1.26           | 158  | 125              | 119                 | 0.007          | 0.47 | 71.4             | 19.5      | 55.9                 |
| <b>vasa-QB-4LNA</b> | 2.38           | 164  | 69               | 129                 | 0.012          | 0.45 | 38.8             | 20.2      | 58.1                 |

[a] extinction coefficient at absorbance maximum, (in L·mol<sup>-1</sup>·cm<sup>-1</sup>); [b] Br(max) = maximum achievable brightness as the product of ε(max)\*Φ/1000.

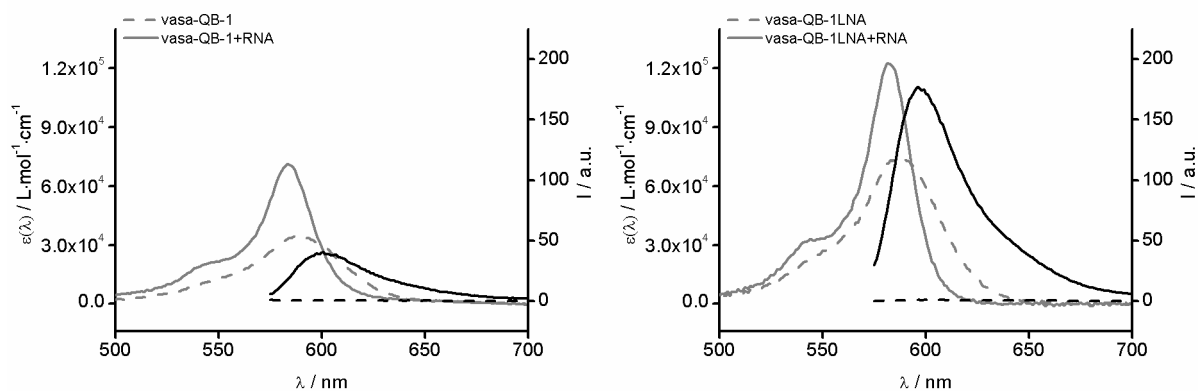

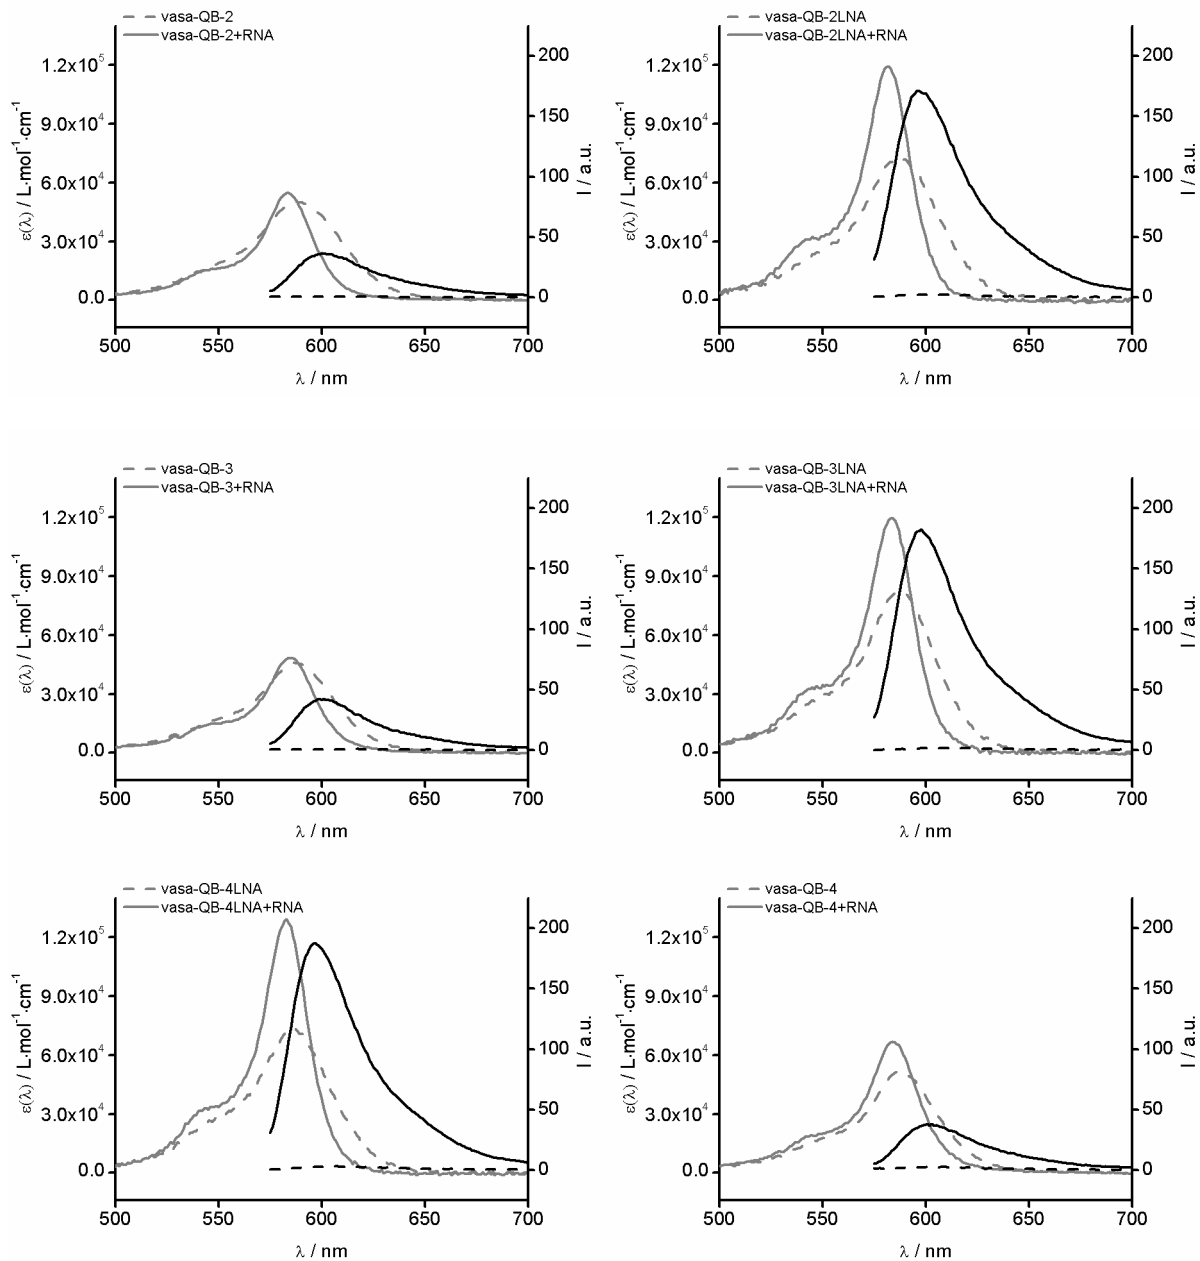

**Figure S6:** Absorption (grey) and emission spectra (black) of 2'-O-Me-modified and LNA/2'-O-Me-modified *vasa*-QB-probes in absence (dotted) and presence of complementary RNA target (solid). Conditions: see Table S8.



## 6.) Multi-colour RNA detection

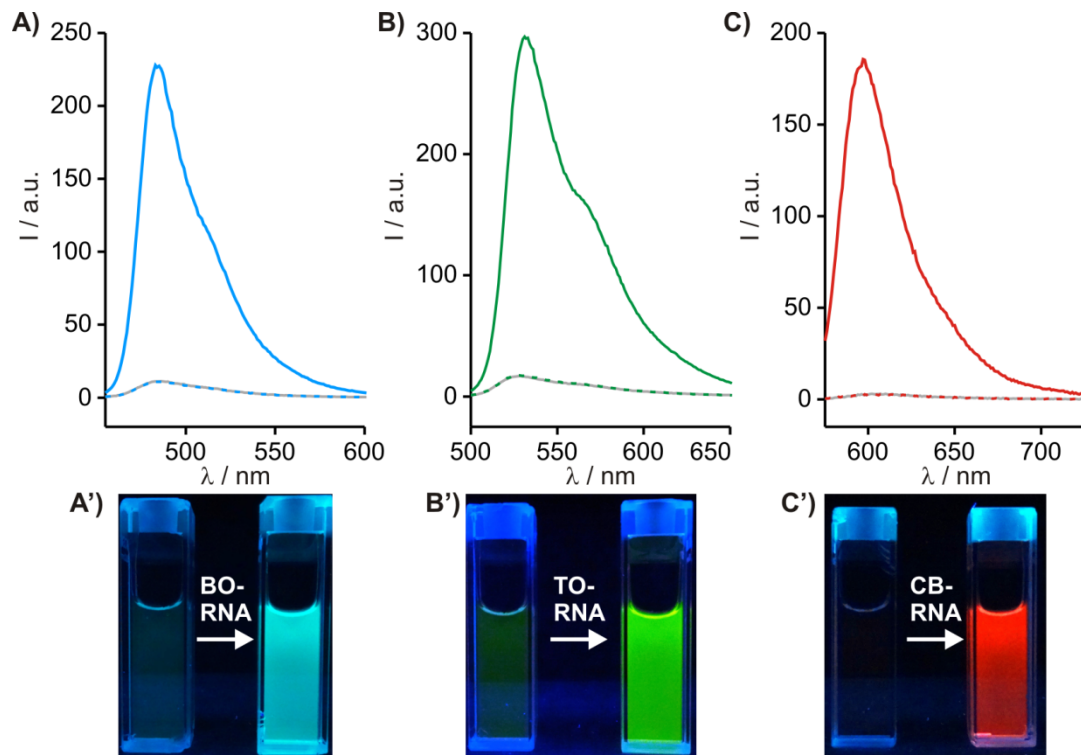

BO-probe: ATGC<sub>1</sub>ACGXC<sub>1</sub>CG  
 BO-RNA: GACGGACGUGCAUAAUUUGCG

TO-probe: TCTATTTTCXT<sub>1</sub>CATTTTCA  
 TO-RNA: UGAAAAUGAUGAAAAUAGA

QB-probe: GGAACTACXT<sub>1</sub>GTTGGGC  
 QB-RNA: GCCCAACAAGUAGUCC

**Figure S7:** A-C) Investigation of sequence specificity. Fluorescence emissions of probe in the absence of target (grey), in the presence of 3 eq. of both of the non-complementary targets (colored dashed) and upon addition of 3 eq. of complementary RNA (colored solid). A'-C') Photos of cuvettes corresponding to A-C before and after addition of complementary RNA; illumination with a handheld UV Lamp (5W). Conditions: 0.5  $\mu$ M probe in PBS and 3 eq. of RNA, when added. BO:  $\lambda(\text{ex}) = 440 \text{ nm}$ ,  $\lambda(\text{em}) = 455\text{-}600 \text{ nm}$ , TO:  $\lambda(\text{ex}) = 485 \text{ nm}$ ,  $\lambda(\text{em}) = 500\text{-}650 \text{ nm}$ , CB:  $\lambda(\text{ex}) = 560 \text{ nm}$ ,  $\lambda(\text{em}) = 575\text{-}725 \text{ nm}$ , slit(ex) = 5 nm, slit(em) = 5 nm, 37 °C.

## 7.) Fluorescence *in-situ* hybridization

### dT(18)-QB probe

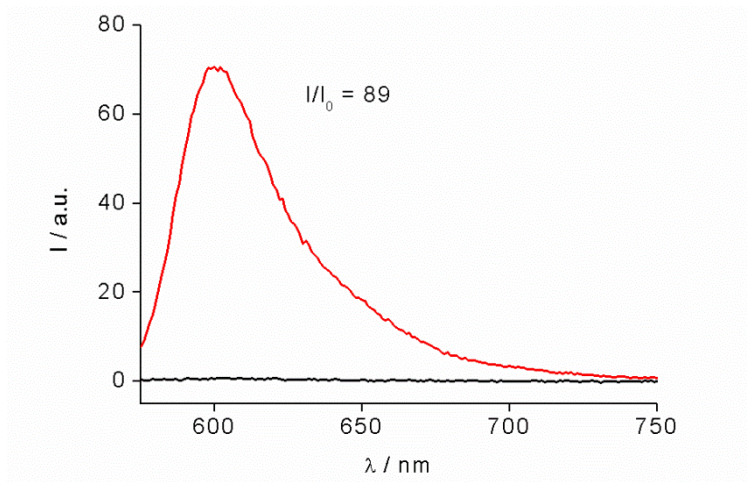

**Figure S8:** Fluorescence emission of LNA-modified poly-dT-QB-probes in absence (black) and presence (red) of 5 eq. complementary RNA. Conditions: 0.5  $\mu\text{M}$  probe in PBS and 5 eq. of RNA, when added.  $\lambda(\text{ex}) = 560 \text{ nm}$ ,  $\lambda(\text{em}) = 575\text{-}725 \text{ nm}$ , slit(ex) = 5 nm, slit(em) = 5 nm, 37  $^{\circ}\text{C}$ ,  $I/I_0$  at 605 nm.

### Oskar-TO-LNA probes

The following probes have been used for the detection of *oskar* mRNA in Oocytes. Detailed information for the synthesis, characterization and application of these probes was previously published: F. Hövelmann, I. Gaspar, S. Loibl, E. A. Ermilov, B. Röder, J. Wengel, A. Ephrussi and O. Seitz, *Angew. Chem. Int. Ed.*, 2014, **53**, 11370-11375.

**Table S9:** TO and LNA labelled probes for the detection of *oskar*-mRNA.

|                     | sequence, X = Ser(TO)                                                     |
|---------------------|---------------------------------------------------------------------------|
| <b>osk-TO-LNA-1</b> | <u>T<sub>L</sub>AAG<sub>L</sub>ATA</u> X <sub>L</sub> AGGT <sub>L</sub> T |
| <b>osk-TO-LNA-2</b> | G <sub>L</sub> CGG <sub>L</sub> AAAAGX <sub>L</sub> TGAAG <sub>L</sub>    |
| <b>osk-TO-LNA-3</b> | C <sub>L</sub> TCGX <sub>L</sub> TCAAT <sub>L</sub> A                     |
| <b>osk-TO-LNA-4</b> | <u>ACCGAT</u> X <sub>L</sub> <u>TGUUCCAGAAC</u>                           |
| <b>osk-TO-LNA-5</b> | <u>CGGUUUUCUGG</u> X <sub>L</sub> <u>TUGGGU</u>                           |

LNA nucleotides are labelled with subscript "L", 2'-O-Me-building blocks are underlined.

### Wash free FISH and imaging

Wash free FISH was performed as described by F. Hövelmann, I. Gaspar, A. Ephrussi and O. Seitz, *J. Am. Chem. Soc.*, 2013, **135**, 19025-19032. Briefly, *w<sup>1118</sup>* ovaries were dissected into 2% paraformaldehyde (PFA), 0.05% Triton-X100 in PBS and were fixed for 20 minutes. Fixative was removed and ovaries were rinsed twice with IBEX (10 mM HEPES, pH=7.7, 100 mM KCl, 1mM EDTA, 0.3% Triton-X). All probes were diluted in IBEX to 0.5  $\mu\text{M}$  final concentration (for osk1-5, this means 0.1  $\mu\text{M}$  concentration per individual probe). This mixture was applied to ovaries (50  $\mu\text{L}$ /ovary) at 35  $^{\circ}\text{C}$  from 30 minutes. Following the incubation, ovaries were transferred onto slides and were

mounted in the staining solution by covering with high precision ( $170\pm 5\mu\text{m}$ ) coverslips and were sealed from air. Imaging was carried out on a Leica SP8 TCS microscope using 63x 1.4 NA oil immersion objective. Fluorescence of TO and QB were excited with 514 nm and 592 nm laser lines of a white-light laser source, emission of the dyes were detected between 525-575 nm and 605-650 nm, respectively. To minimize bleed-through, the two dyes were imaged sequentially. For single colour imaging, emission and excitation settings of QB were used and all probes were excited with constant 0.7% of maximal output of the 592nm laser line. For super resolution STED imaging, we used a Leica SP8 gated-STED 3x microscope with a 100x 1.4 NA oil immersion objective. To prevent premature photobleaching, we first acquired the entire stack of images of the QB labelled probe ( $\lambda_{\text{ex}}=575\text{ nm}$ ,  $\lambda_{\text{ex}}=605-650\text{ nm}$ ,  $\lambda_{\text{depletion}}=775\text{ nm}$ ) then followed with the imaging of TO ( $\lambda_{\text{ex}}=514\text{ nm}$ ,  $\lambda_{\text{ex}}=525-570\text{ nm}$ ,  $\lambda_{\text{depletion}}=592\text{ nm}$ ). All dual color FISH images were deconvoluted with Huygens Professional to maximize image quality.

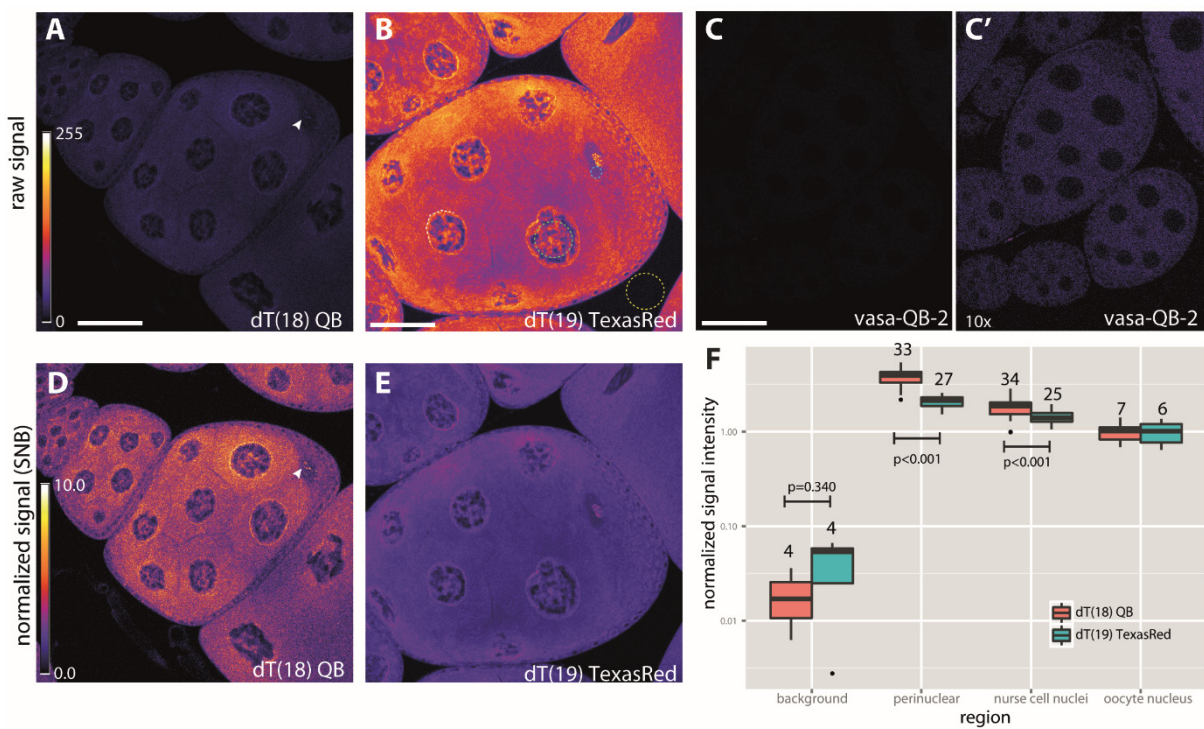

**Figure S9:** Wash-free FISH of fixed *Drosophila* egg chambers. (A-C') Raw images of egg chambers labelled with (A) dT(18) QB, (B) dT(19) TexasRed or (C and C') *Danio rerio* Vasa 2-4 QB. Images were acquired using the same microscope settings. (C') 10-fold enhanced brightness of (C) Vasa 2-4 QB labelling. Scale bars represent 50 microns (A-C). (D and E) Normalized images of A and B. Normalization was done against the background signal measured within the oocyte nuclei (B, cyan dashed circle). (F) Comparison of normalized signal intensities of dT<sub>18</sub>-QB and TexasRed-labelled dT<sub>19</sub> measured in the cell free background (yellow dashed circle, B), within nurse cell nuclei (green dashed circle, B) and in the nurse cell perinuclear region (white dashed polyline, B). Numbers above the boxplots indicate sample size. P values indicate the p values of pairwise Mann Whitney U tests.

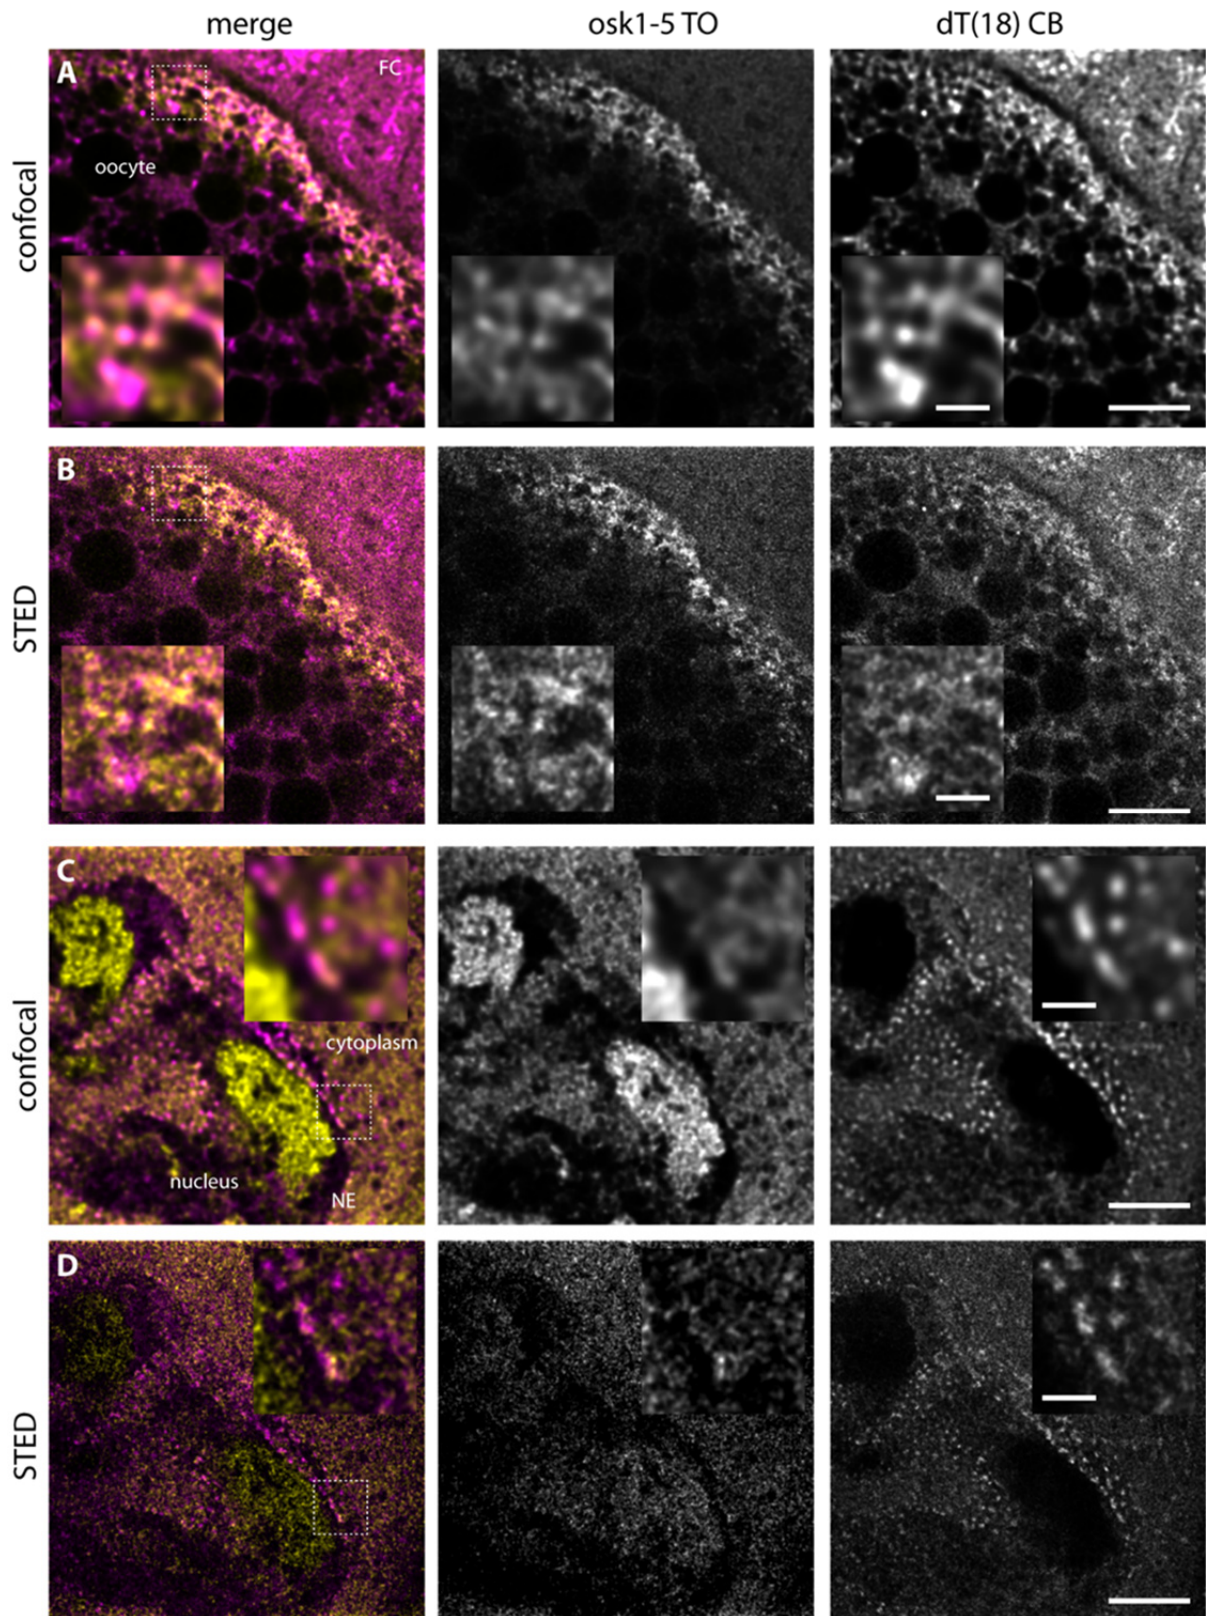

**Figure S10:** High and super-resolution images of dual colour wash free FISH. Oocyte posterior region (A and B) and nurse cell (C and D) of a stage 10 egg chamber imaged with point scanning confocal (A and C) and STED (B and D) microscopy. FC represent follicle cells (A), NE represent the nuclear envelope (C). Insets are enlarged versions of the image areas within the dashed boxes (A-D). Scale bars in main panels and in insets represent five and one microns, respectively. Intensive signal within the nurse cell nuclei in the TO channel (yellow, C) represent non-specific accumulation of the probe in the nucleolus, which is observed occasionally.

## 8.) NMR-spectra

DMTr-Ser(Tfa)-OH (S5)

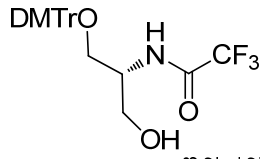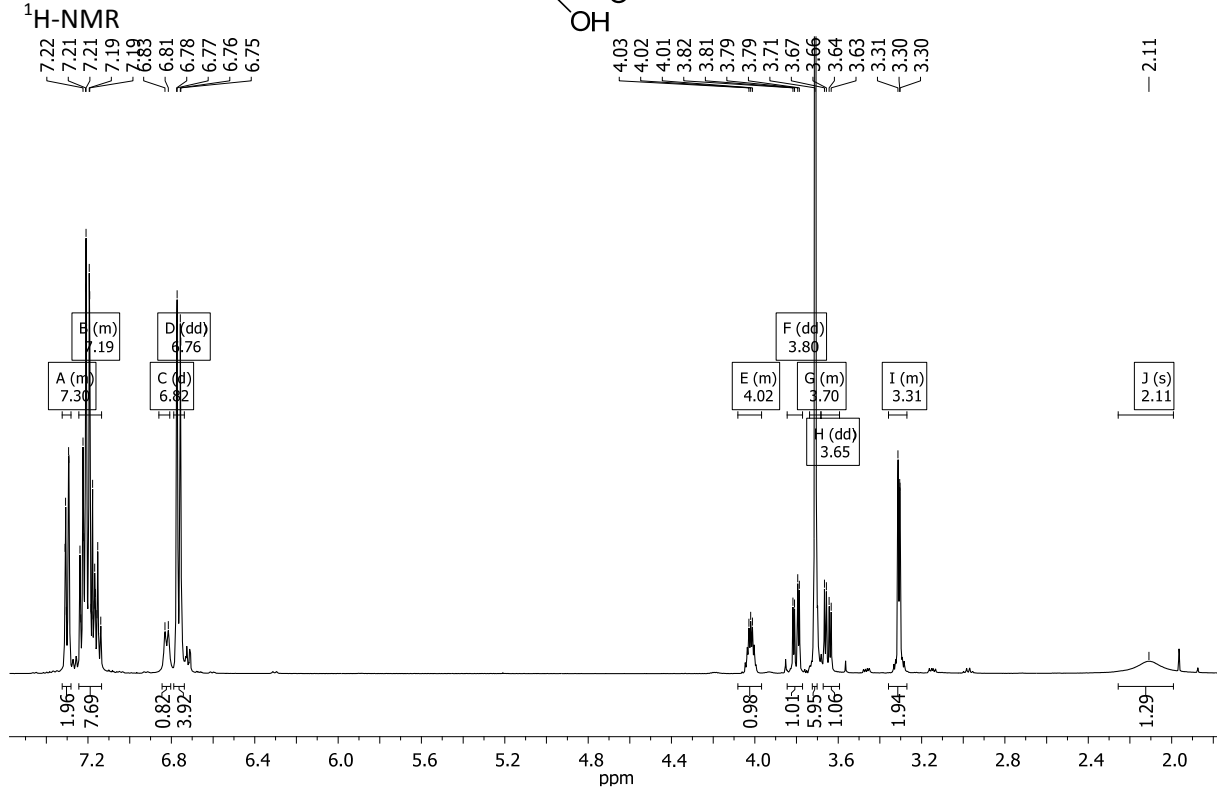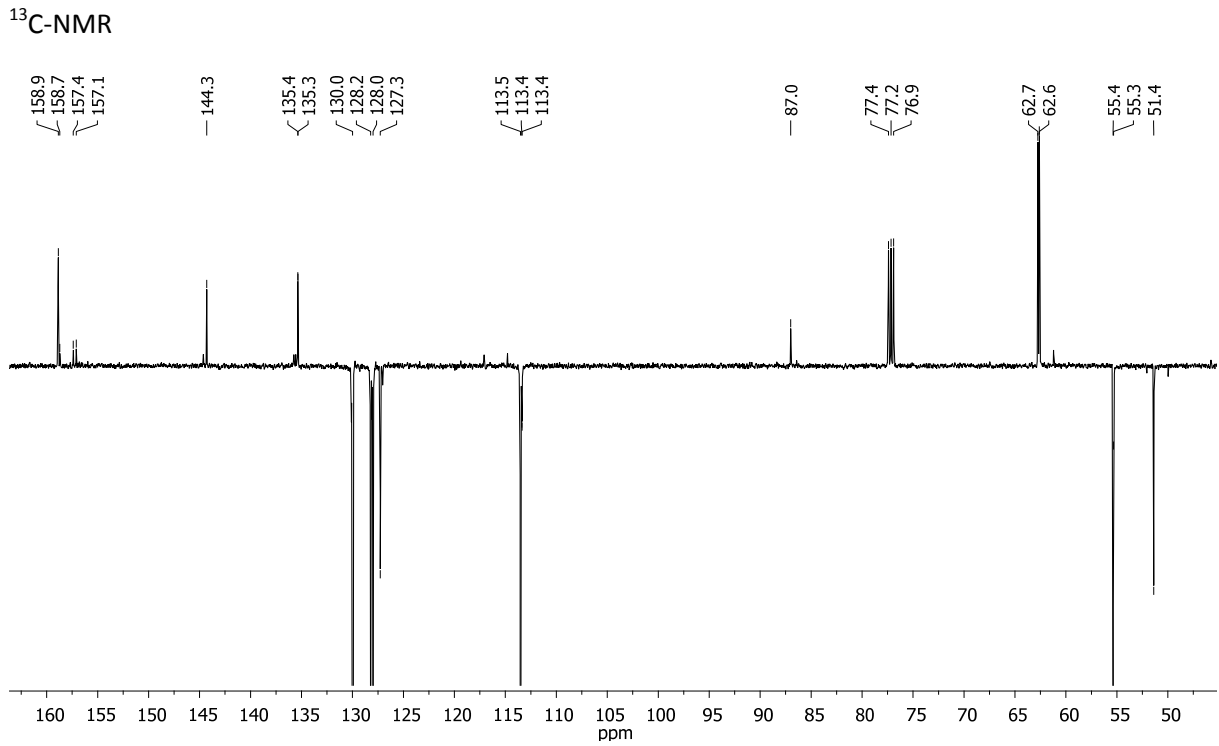

# DMTr-Ser(Tfa)-phosphoramidite (S6)

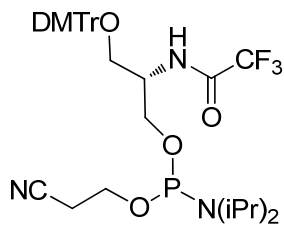

## <sup>1</sup>H-NMR

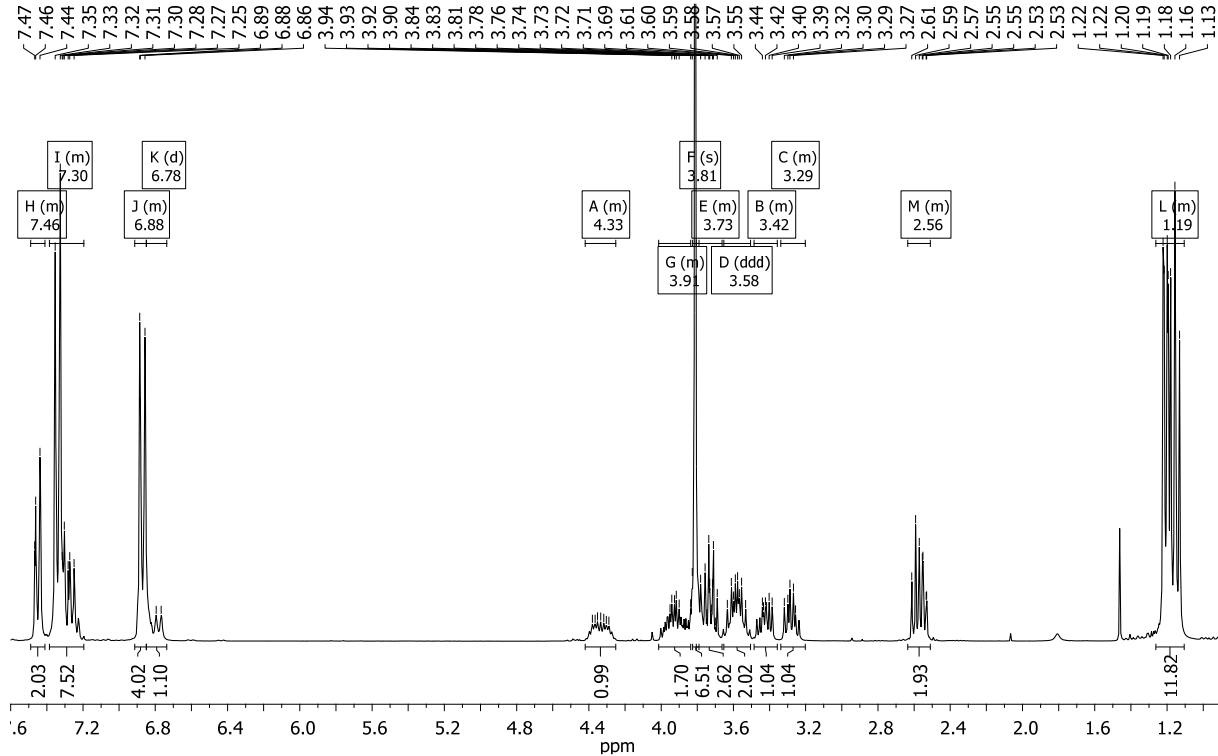

## <sup>31</sup>P-NMR

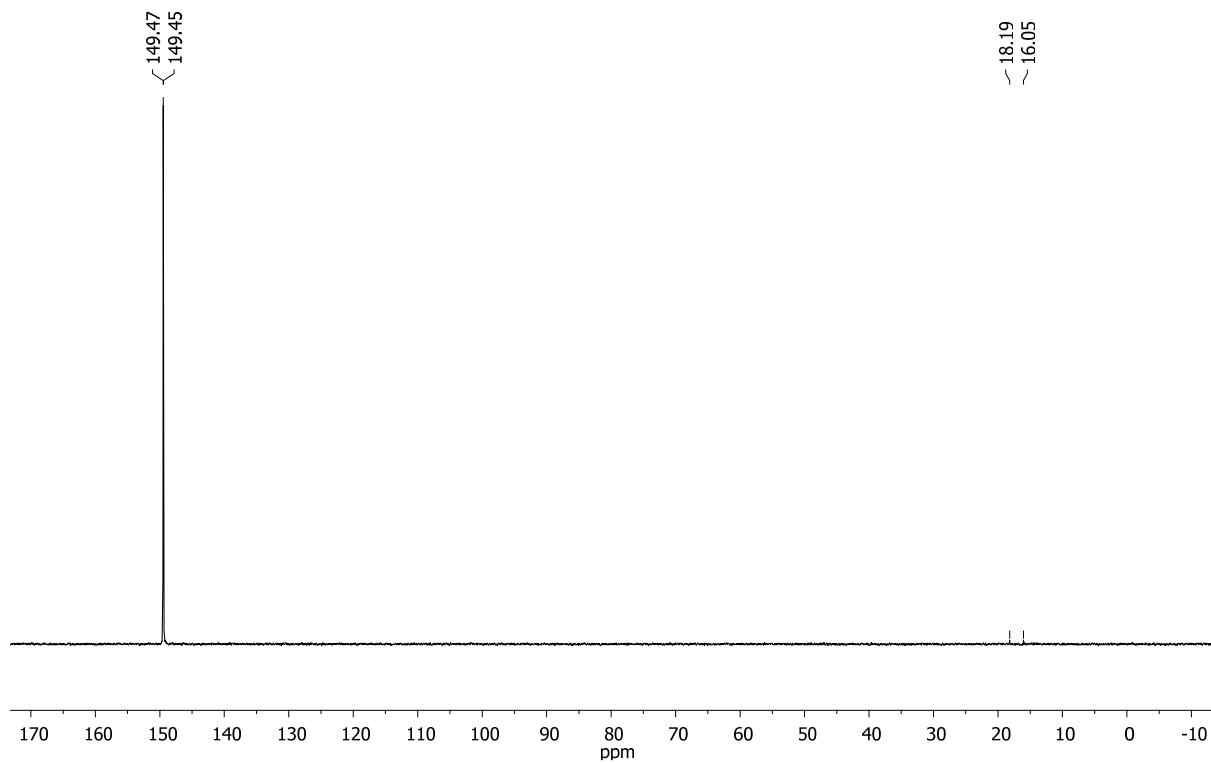

**Quinoline violet (QV, S11)**

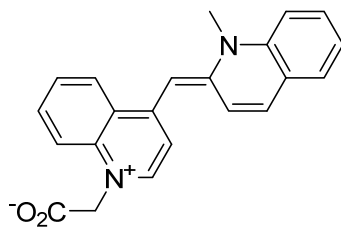

<sup>1</sup>H-NMR

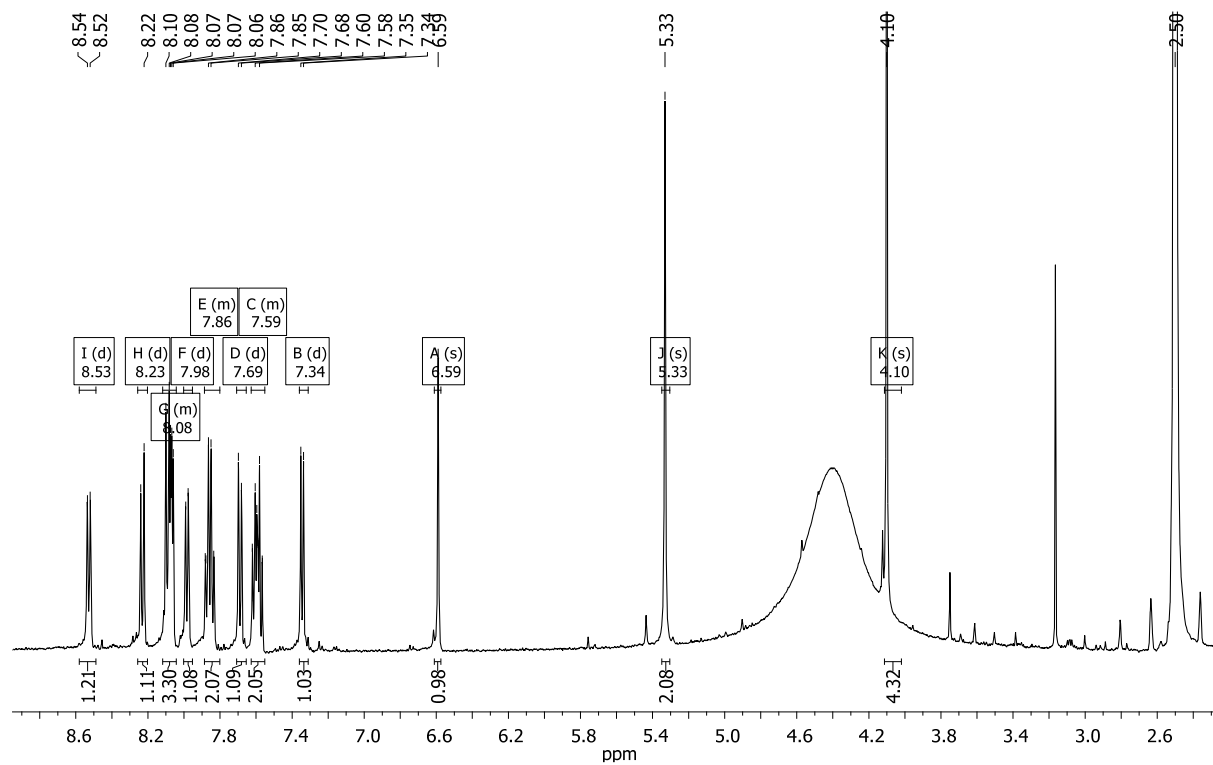

<sup>13</sup>C-NMR

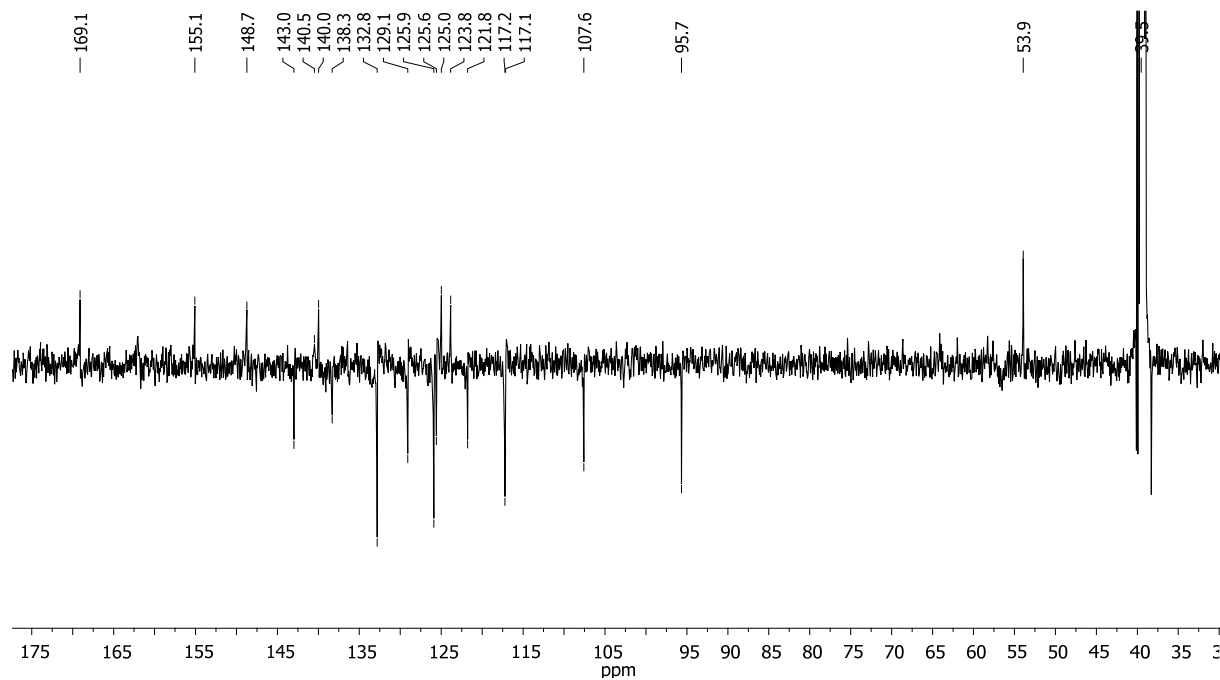

# Quinoline Blue (QB, S12)

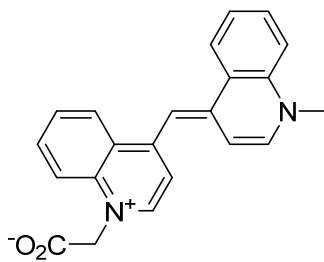

## <sup>1</sup>H-NMR

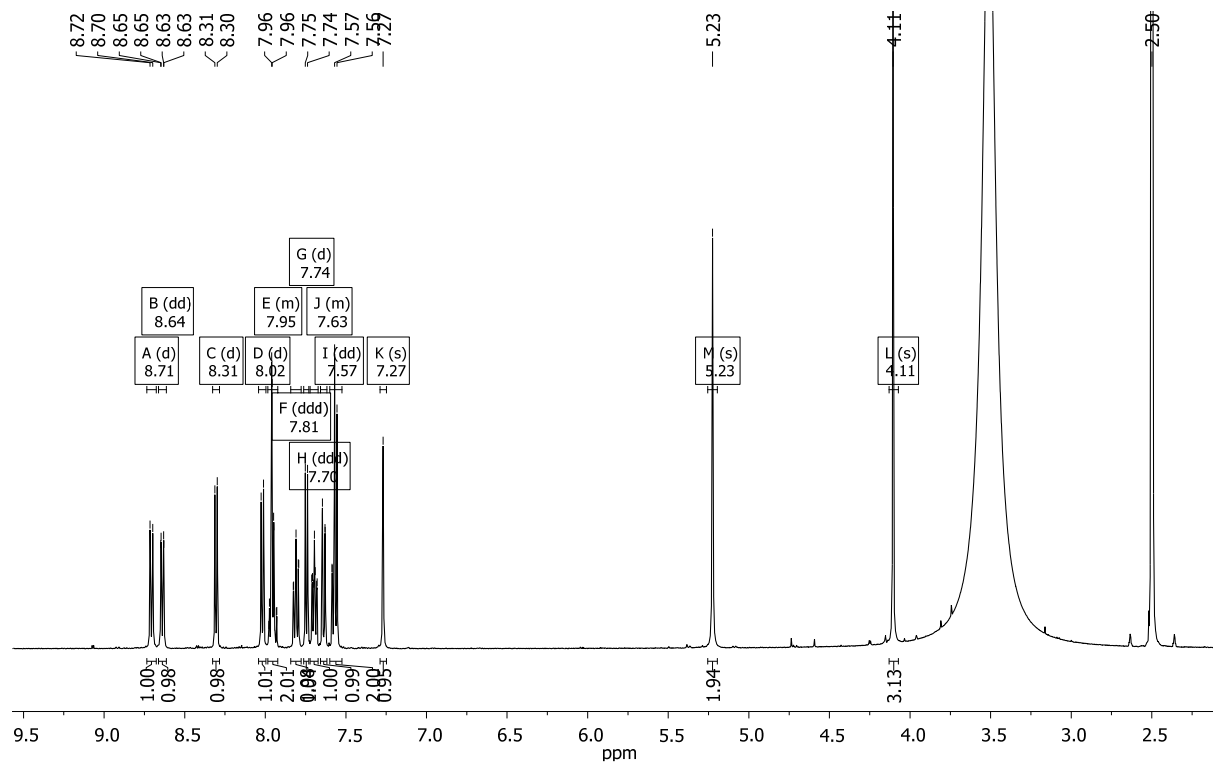

## <sup>13</sup>C-NMR

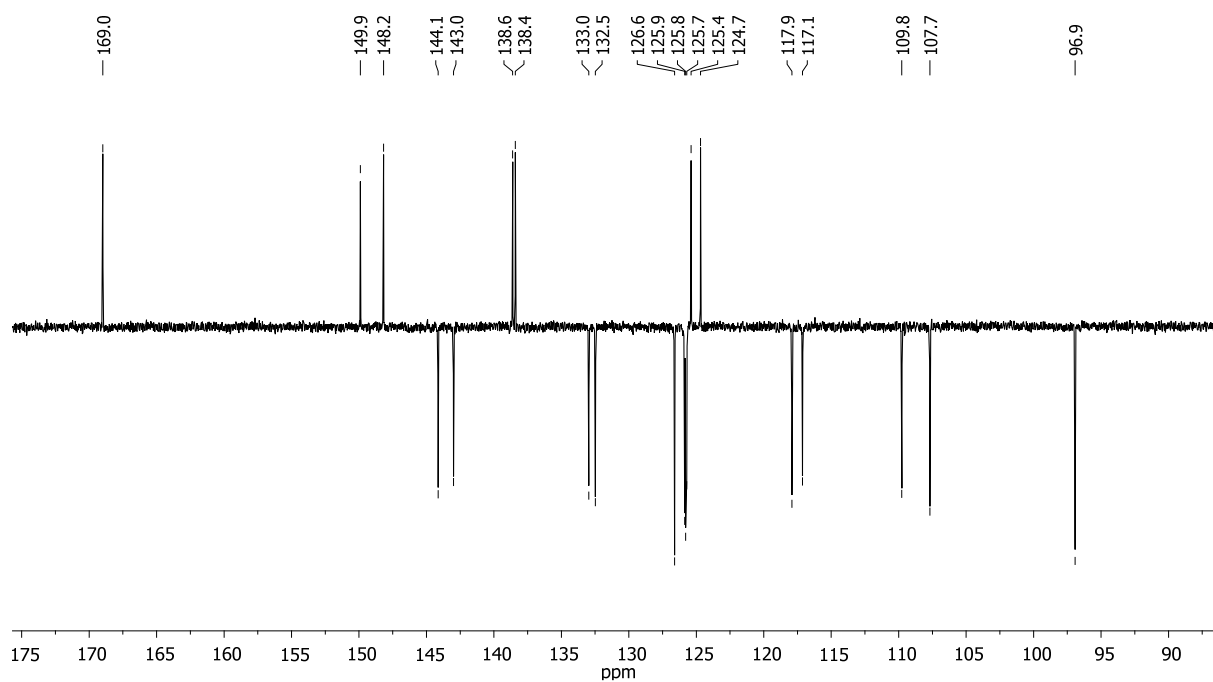



# Thiazole Red (TR, S15)

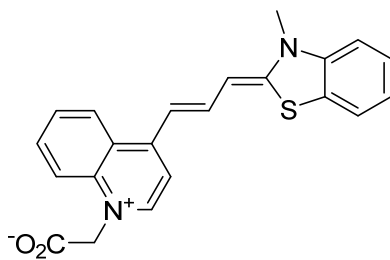

## <sup>1</sup>H-NMR

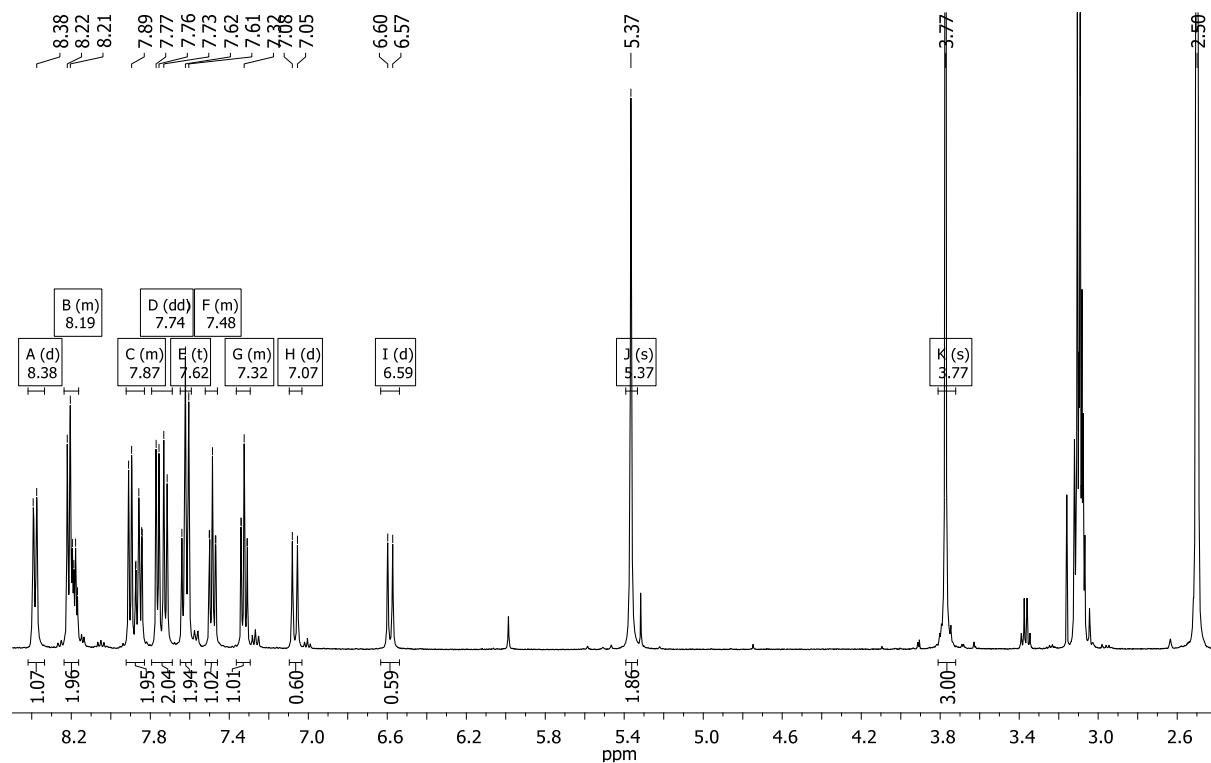

## <sup>13</sup>C-NMR

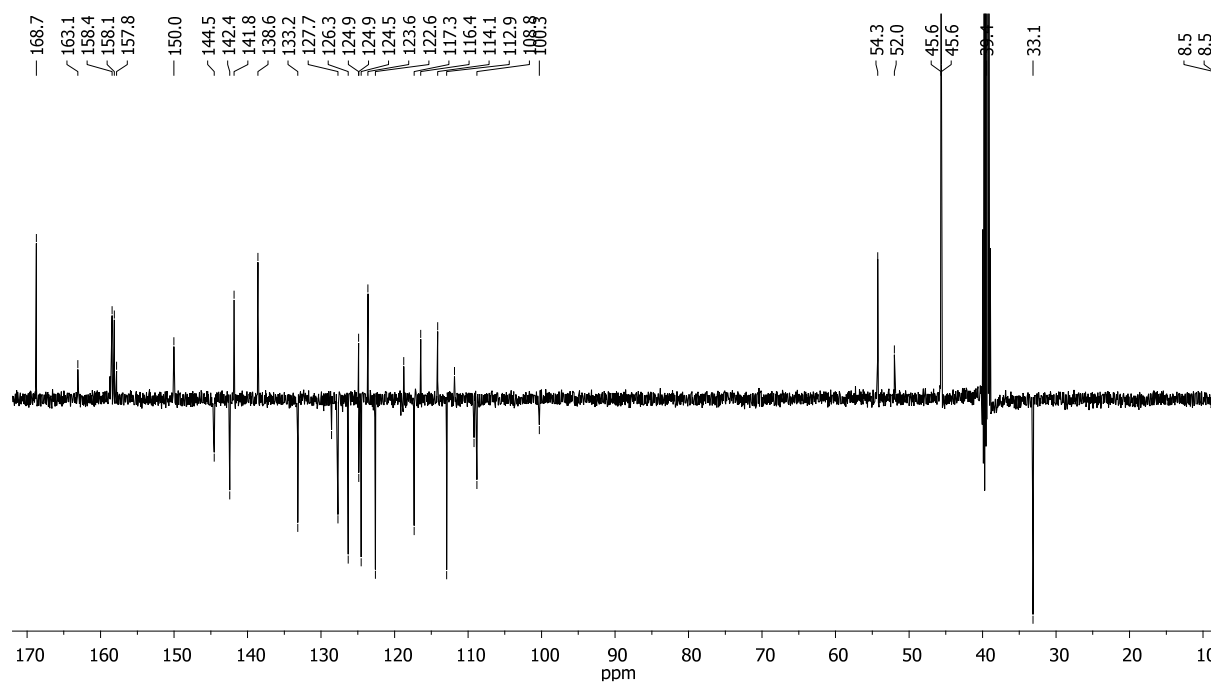

DMTr-Ser(QB)-OTBS (S17)

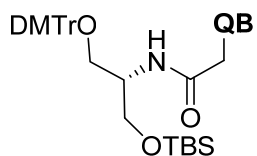

<sup>1</sup>H-NMR

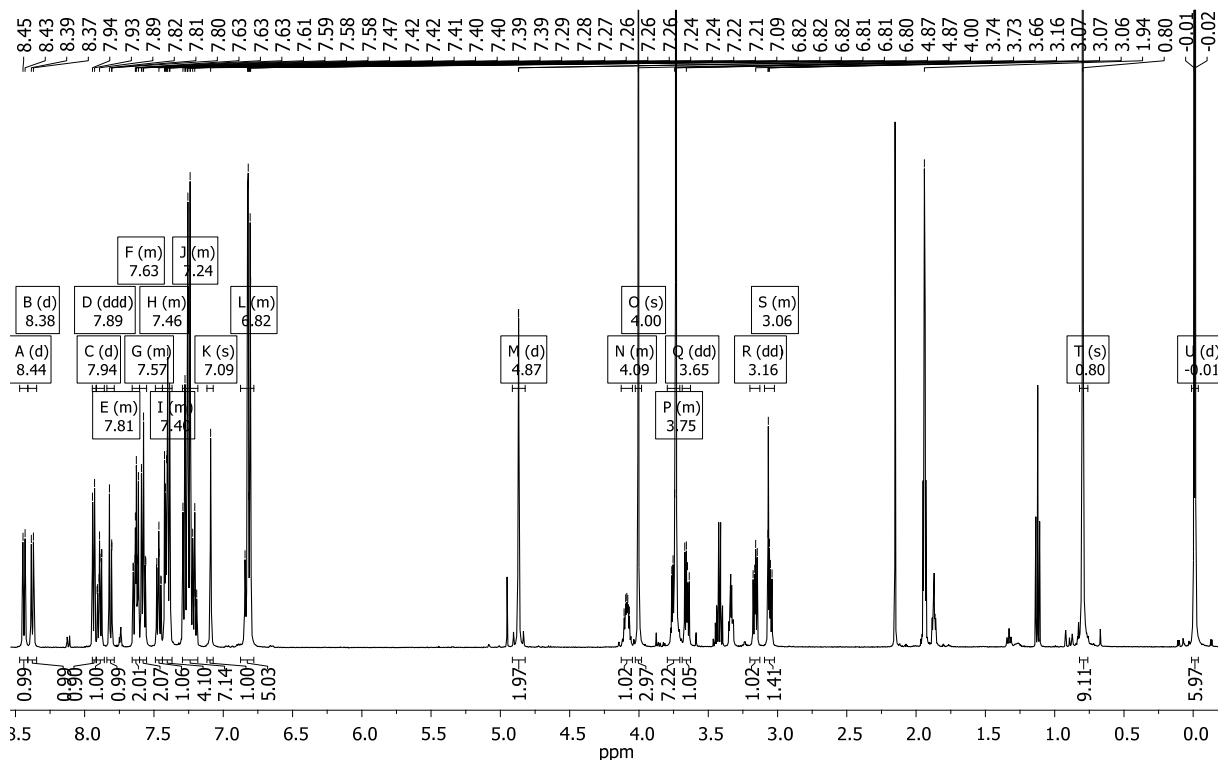

<sup>13</sup>C-NMR

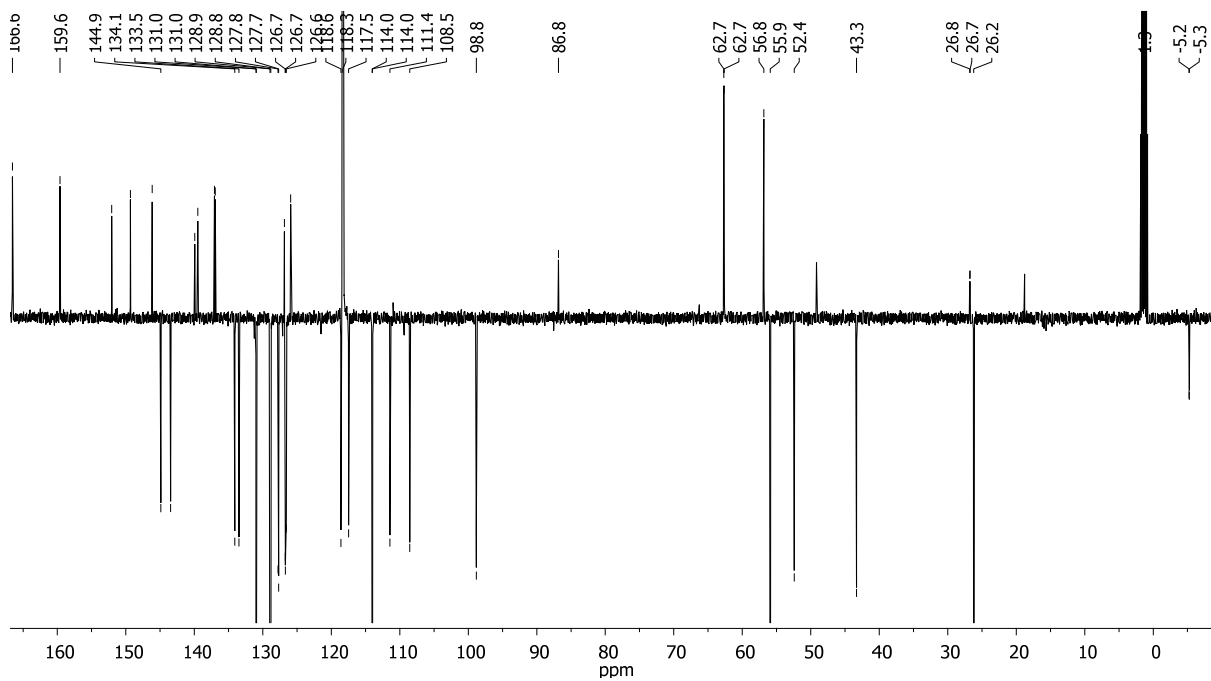

DMTr-Ser(QB)-OH (S18)

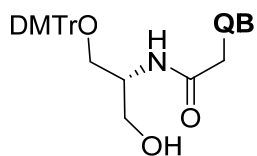

<sup>1</sup>H-NMR

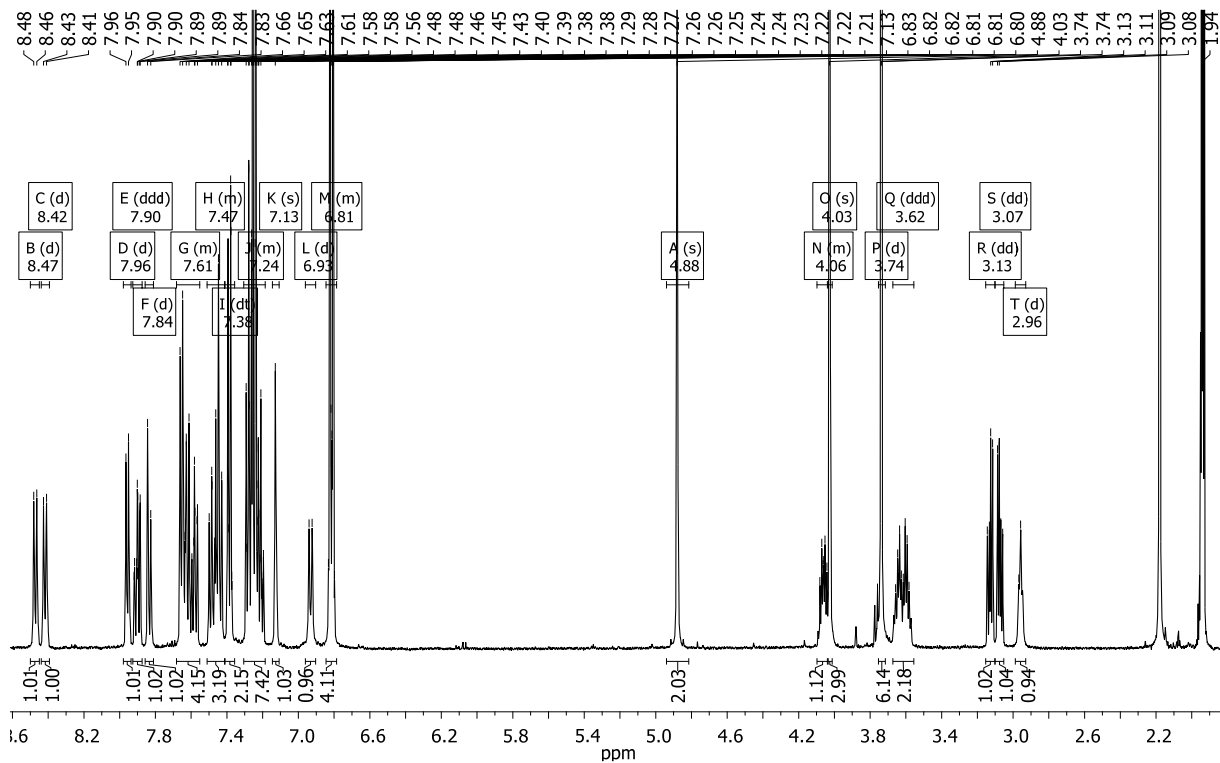

<sup>13</sup>C-NMR

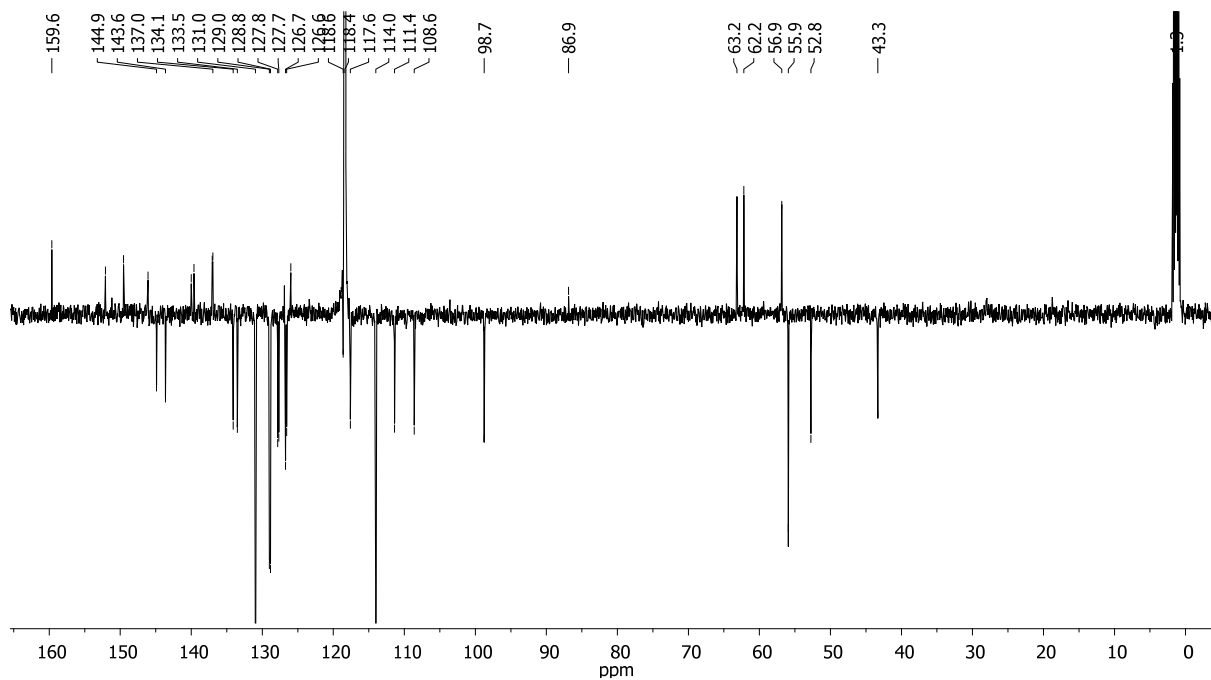

Supplement: SC-007-C5SC03053F-s001.pdf [file SC-007-C5SC03053F-s001.pdf]
